# Supplementary material for: Extrinsic activin signaling cooperates with an intrinsic temporal program to increase mushroom body neuronal diversity
Source: eLife. 2020 Jul 6;9:e58880. doi: 10.7554/eLife.58880 (PMC7365662; doi:10.7554/eLife.58880)
Supplement: Figure 1—source data 1. [file elife-58880-fig1-data1.xlsx]

## Sheet: Figure 1H
							condition	number of strong Mamo cells in clone	number of strong Mamo cells outside MB	total number of strong Mamo cells	experiment	percentage of strong Mamo in clone	percentage		clone size
wt	27.0677						wt	108	9	408	703, 002	0.270677	27.0677		518
wt	28.0193						wt	116	8	422	703, 001	0.280193	28.0193		343
wt	23.991						wt	107	6	452	704, 001	0.23991	23.991		558
wt	23.9514						wt	217	2	455	704, 002	0.239514	23.9514		1131
wt	24.1706						wt	102	20	442	704, 003	0.241706	24.1706		602
wt	27.2222						wt	98	0	360	704, 004	0.272222	27.2222		590
wt	24.282						wt	93	6	389	704, 005	0.24282	24.282		559
babo	1.18577
babo	0.70922						babo	3	0	253	702, 001	0.0118577	1.18577		615
babo	1.79104						babo	2	34	316	702, 002	0.0070922	0.70922		n/a
babo	2.4911						babo	6	10	345	702, 003, top	0.0179104	1.79104		571
babo	3.27273						babo	7	4	285	702, 003, bot	0.024911	2.4911		563
babo	1.87266						babo	9	4	279	702, 004	0.0327273	3.27273		475
babo	2.46914						babo	5	0	267	702, 005	0.0187266	1.87266		585
babo	3.82979						babo	6	4	247	702, 006	0.0246914	2.46914		519
							babo	9	14	249	702, 007	0.0382979	3.82979		531
25.5292
2.20268
1.32911e-13

## Sheet: Figure 1H (clone size)
							condition	number of strong Mamo cells in clone	number of strong Mamo cells outside MB	total number of strong Mamo cells	experiment	percentage of strong Mamo in clone	percentage		clone size
wt	518						wt	108	9	408	703, 002	0.270677	27.0677		518
wt	343						wt	116	8	422	703, 001	0.280193	28.0193		343
wt	558						wt	107	6	452	704, 001	0.23991	23.991		558
wt	565.5						wt	217	2	455	704, 002	0.239514	23.9514		1131
wt	602						wt	102	20	442	704, 003	0.241706	24.1706		602
wt	590						wt	98	0	360	704, 004	0.272222	27.2222		590
wt	559						wt	93	6	389	704, 005	0.24282	24.282		559
babo	615
babo	571						babo	3	0	253	702, 001	0.0118577	1.18577		615
babo	563						babo	2	34	316	702, 002	0.0070922	0.70922		n/a
babo	475						babo	6	10	345	702, 003, top	0.0179104	1.79104		571
babo	585						babo	7	4	285	702, 003, bot	0.024911	2.4911		563
babo	519						babo	9	4	279	702, 004	0.0327273	3.27273		475
babo	531						babo	5	0	267	702, 005	0.0187266	1.87266		585
							babo	6	4	247	702, 006	0.0246914	2.46914		519
							babo	9	14	249	702, 007	0.0382979	3.82979		531
533.643
551.286
0.648158

## Sheet: Figure 1I-K
condition	GFP+	GFP+, Trio+	experiment
Control (41C07-Gal4)		79	648, 007		wt	79						wt	300						wt	223
Control (41C07-Gal4)		92	648, 003		wt	92						wt	293						wt	111
Control (41C07-Gal4)		79	726, 002		wt	79						wt	290						wt	166
Control (41C07-Gal4)		76	726, 001		wt	76						wt	273						wt	168
					babo	0						wt	277						wt	107
babo (41C07-Gal4)		0	643, 019		babo	3						wt	227						wt	145
babo (41C07-Gal4)		3	643, 015, top		babo	4						wt	272						wt	133
babo (41C07-Gal4)		4	643, 015, bottom		babo	2						babo	184						wt	197
babo (41C07-Gal4)		2	643, 011		babo	1						babo	240						wt	152
babo (41C07-Gal4)		1	643, 007		babo	2						babo	169						wt	141
babo (41C07-Gal4)		2	725, 001		babo	4						babo	217						babo	204
babo (41C07-Gal4)		4	725, 002		babo	1						babo	230						babo	178
babo (41C07-Gal4)		1	725, 003									babo	276						babo	184
					t.test	2.34184e-11						babo	254						babo	229
Control (44E04-Gal4)	300		649			81.5						babo	261						babo	133
Control (44E04-Gal4)	293		649			2.125													babo	99
Control (44E04-Gal4)	290		728, 001									t.test	0.0135655		`				babo	134
Control (44E04-Gal4)	273		728, 002										276						babo	234
Control (44E04-Gal4)	277		728, 003										228.875						babo	192
Control (44E04-Gal4)	227		728, 004																babo	179
Control (44E04-Gal4)	272		728, 005																babo	217
																			babo	158
babo (44E04-Gal4)	184		727, 005
babo (44E04-Gal4)	240		727, 004																t.test	0.164486
babo (44E04-Gal4)	169		727, 003																average wt	154.3
babo (44E04-Gal4)	217		727, 002																average mt	178.417
babo (44E04-Gal4)	230		727, 001
babo (44E04-Gal4)	276		644
babo (44E04-Gal4)	254		644 (same brain)
babo (44E04-Gal4)	261		644
control (71G10-Gal4)	223		743, 001
control (71G10-Gal4)	111		743, 002
control (71G10-Gal4)	166		743, 003
control (71G10-Gal4)	168		743, 004
control (71G10-Gal4)	107		743, 005
control (71G10-Gal4)	145		743, 006
control (71G10-Gal4)	133		743, 007
control (71G10-Gal4)	197		743, 008
control (71G10-Gal4)	152		743, 009
control (71G10-Gal4)	141		743. 010
babo (71G10-Gal4)	204		729, 001
babo (71G10-Gal4)	178		729, 002
babo (71G10-Gal4)	184		729, 003
babo (71G10-Gal4)	229		742, 001
babo (71G10-Gal4)	133		742, 002
babo (71G10-Gal4)	99		742, 003
babo (71G10-Gal4)	134		742, 004
babo (71G10-Gal4)	234		742, 005
babo (71G10-Gal4)	192		739, 001
babo (71G10-Gal4)	179		739, 002
babo (71G10-Gal4)	217		739, 003
babo (71G10-Gal4)	158		739, 004

## Sheet: Figure 1-figure supplement 1Q
wildtype	379							condition	total number of strong Mamo cells	experiment
wildtype	405							babo-RNAi with OK107	358	737, 004, bot
wildtype	413							babo-RNAi with OK107	342	737, 004, top
wildtype	351							babo-RNAi with OK107	312	737, 006, top
wildtype	381							babo-RNAi with OK107	337	737, 006, bot
wildtype	347							babo-RNAi with OK107	337	737, 005, top
babo-RNAi	358							babo-RNAi with OK107	286	737, 005, bot
babo-RNAi	342
babo-RNAi	312							OK107-Gal4 RNAi control	379	732, 003, top
babo-RNAi	337							OK107-Gal4 RNAi control	405	732, 003, bot
babo-RNAi	337							OK107-Gal4 RNAi control	413	732, 004, top
babo-RNAi	286							OK107-Gal4 RNAi control	351	732, 004, bot
								OK107-Gal4 RNAi control	381	732, 005, top
t.test	0.00753672							OK107-Gal4 RNAi control	347	732, 005, bot
avg wt	379.333
avg mt	328.667
