# Supplementary material for: Extrinsic activin signaling cooperates with an intrinsic temporal program to increase mushroom body neuronal diversity
Source: eLife. 2020 Jul 6;9:e58880. doi: 10.7554/eLife.58880 (PMC7365662; doi:10.7554/eLife.58880)
Supplement: Figure 2—source data 1. [file elife-58880-fig2-data1.xlsx]

## Sheet: Figure 2, Figure 2-fig supp 1B
IMP in babo @ L3							SYP in babo @ L3							Condition	Imp:Syp	Imp	Syp		Condition	Imp:Syp	Imp	Syp		Condition	Imp		Condition	Syp
	Area	Mean	IntDen	RawIntDen	experiment			Area	Mean	IntDen	RawIntDen	experiment				IntDen	IntDen				IntDen	IntDen			IntDen	corr.		IntDen	corr.
babo	120.835	94.1	11370.6	226123	696, 005		babo	120.835	29.479	3562.03	70837	696, 005		babo	3.19216	11370.6	3562.03		wt	2.63505	7802.71	2961.13		wt	7802.71	68.6219	wt	2961.13	57.2224
babo	98.81	93.441	9232.87	183611	696, 005		babo	98.81	23.733	2345.04	46635	696, 005		babo	3.93719	9232.87	2345.04		wt	1.76664	9141.95	5174.77		wt	9141.95	80.4	wt	5174.77	100
wt	123.651	63.103	7802.71	155170	696, 005		wt	123.651	23.948	2961.13	58887	696, 005		wt	2.63505	7802.71	2961.13		wt	1.66085	5165.37	3110.07		wt	5165.37	45.4275	wt	3110.07	60.1007
wt	132.953	68.761	9141.95	181803	696, 005		wt	132.953	38.922	5174.77	102909	696, 005		wt	1.76664	9141.95	5174.77		wt	2.90897	5135.95	1765.55		wt	5135.95	45.1688	wt	1765.55	34.1185
wt	82.97	62.256	5165.37	102722	696, 005		wt	82.97	37.484	3110.07	61849	696, 005		wt	1.66085	5165.37	3110.07		wt	5.1064	6132.3	1200.9		wt	6132.3	53.9313	wt	1200.9	23.2069
wt	78.847	65.138	5135.95	102137	696, 005		wt	78.847	22.392	1765.55	35111	696, 005		wt	2.90897	5135.95	1765.55		wt	5.00423	5412.72	1081.63		wt	5412.72	47.6029	wt	1081.63	20.902
wt	107.811	56.88	6132.3	121951	696, 005		wt	107.811	11.139	1200.9	23882	696, 005		wt	5.1064	6132.3	1200.9		wt	2.21249	6452.46	2916.38		wt	6452.46	56.747	wt	2916.38	56.3576
wt	88.25	61.334	5412.72	107641	696, 005		wt	88.25	12.256	1081.63	21510	696, 005		wt	5.00423	5412.72	1081.63		wt	2.15645	5562.92	2579.67		wt	5562.92	48.9238	wt	2579.67	49.8508
																			wt	3.00174	6671.2	2222.44		wt	6671.2	58.6707	wt	2222.44	42.9477
babo	103.134	73.247	7554.25	150229	696, 004, top		babo	103.134	12.002	1237.81	24616	696, 004, top		babo	6.1029	7554.25	1237.81		wt	2.17435	5238.98	2409.45		wt	5238.98	46.0749	wt	2409.45	46.5615
babo	82.065	78.203	6417.77	127628	696, 004, bottom		babo	82.065	15.922	1306.6	25984	696, 004, bottom		babo	4.91179	6417.77	1306.6		wt	1.66572	5560.21	3338.01		wt	5560.21	48.8999	wt	3338.01	64.5055
wt	136.725	47.193	6452.46	128318	696, 004		wt	136.725	21.33	2916.38	57997	696, 004		wt	2.21249	6452.46	2916.38		wt	1.77552	6031.88	3397.25		wt	6031.88	53.0481	wt	3397.25	65.6502
wt	115.454	48.183	5562.92	110628	696, 004		wt	115.454	22.344	2579.67	51301	696, 004		wt	2.15645	5562.92	2579.67		wt	2.08529	4031.39	1933.25		wt	4031.39	35.4546	wt	1933.25	37.3592
wt	104.693	63.721	6671.2	132668	696, 004		wt	104.693	21.228	2222.44	44197	696, 004		wt	3.00174	6671.2	2222.44		wt	2.18553	2981.9	1364.38		wt	2981.9	26.2247	wt	1364.38	26.366
wt	117.013	44.773	5238.98	104186	696, 004		wt	117.013	20.591	2409.45	47916	696, 004		wt	2.17435	5238.98	2409.45		wt	2.26785	5451.84	2403.97		wt	5451.84	47.9469	wt	2403.97	46.4556
wt	91.066	61.057	5560.21	110574	696, 004		wt	91.066	36.655	3338.01	66382	696, 004		wt	1.66572	5560.21	3338.01		wt	1.64445	5470.75	3326.8		wt	5470.75	48.1132	wt	3326.8	64.2888
wt	118.723	50.806	6031.88	119954	696, 004		wt	118.723	28.615	3397.25	67560	696, 004		wt	1.77552	6031.88	3397.25		wt	5.64148	4806.13	851.927		wt	4806.13	42.2681	wt	851.927	16.4631
																			wt	1.5159	4571.25	3015.54		wt	4571.25	40.2025	wt	3015.54	58.2738
babo	87.445	51.236	4480.39	89100	696, 003, top		babo	87.445	17.012	1487.58	29583	696, 003, top		babo	3.01186	4480.39	1487.58		wt	1.3394	6006.48	4484.46		wt	6006.48	52.8248	wt	4484.46	86.66
babo	118.32	80.389	9511.65	189155	696, 003, bottom		babo	118.32	18.449	2182.92	43411	696, 003, bottom		babo	4.35731	9511.65	2182.92		wt	1.55707	4977.1	3196.46		wt	4977.1	43.7718	wt	3196.46	61.7701
babo	136.524	70.723	9655.36	192013	696, 003, bottom		babo	136.524	25.192	3439.34	68397	696, 003, bottom		babo	2.80733	9655.36	3439.34		wt	2.1169	2912.96	1376.05		wt	2912.96	25.6184	wt	1376.05	26.5915
wt	100.922	39.946	4031.39	80171	696, 003		wt	100.922	19.156	1933.25	38446	696, 003		wt	2.08529	4031.39	1933.25		wt	1.92647	4695.71	2437.46		wt	4695.71	41.297	wt	2437.46	47.1028
wt	75.025	39.745	2981.9	59300	696, 003		wt	75.025	18.186	1364.38	27133	696, 003		wt	2.18553	2981.9	1364.38		wt	1.93963	4192.61	2161.55		wt	4192.61	36.8724	wt	2161.55	41.7709
wt	128.126	42.551	5451.84	108419	696, 003		wt	128.126	18.763	2403.97	47807	696, 003		wt	2.26785	5451.84	2403.97		babo	3.19216	11370.6	3562.03		babo	11370.6	100	babo	3562.03	68.8346
wt	93.279	58.65	5470.75	108795	696, 003		wt	93.279	35.665	3326.8	66159	696, 003		wt	1.64445	5470.75	3326.8		babo	3.93719	9232.87	2345.04		babo	9232.87	81.1996	babo	2345.04	45.3167
wt	107.459	44.725	4806.13	95578	696, 003		wt	107.459	7.928	851.927	16942	696, 003		wt	5.64148	4806.13	851.927		babo	6.1029	7554.25	1237.81		babo	7554.25	66.4368	babo	1237.81	23.9202
																			babo	4.91179	6417.77	1306.6		babo	6417.77	56.4418	babo	1306.6	25.2495
babo	125.36	70.872	8884.54	176684	696, 002, top		babo	125.36	15.972	2002.24	39818	696, 002, top		babo	4.43729	8884.54	2002.24		babo	3.01186	4480.39	1487.58		babo	4480.39	39.4033	babo	1487.58	28.7468
babo	89.155	61.898	5518.52	109745	696, 002, bottom		babo	89.155	12.835	1144.33	22757	696, 002, bottom		babo	4.82247	5518.52	1144.33		babo	4.35731	9511.65	2182.92		babo	9511.65	83.6514	babo	2182.92	42.1839
wt	121.438	37.643	4571.25	90907	696, 002		wt	121.438	24.832	3015.54	59969	696, 002		wt	1.5159	4571.25	3015.54		babo	2.80733	9655.36	3439.34		babo	9655.36	84.9153	babo	3439.34	66.4636
wt	130.791	45.924	6006.48	119449	696, 002		wt	130.791	34.287	4484.46	89181	696, 002		wt	1.3394	6006.48	4484.46		babo	4.43729	8884.54	2002.24		babo	8884.54	78.1362	babo	2002.24	38.6924
wt	110.627	44.99	4977.1	98978	696, 002		wt	110.627	28.894	3196.46	63567	696, 002		wt	1.55707	4977.1	3196.46		babo	4.82247	5518.52	1144.33		babo	5518.52	48.5333	babo	1144.33	22.1137
wt	89.809	32.435	2912.96	57929	696, 002		wt	89.809	15.322	1376.05	27365	696, 002		wt	2.1169	2912.96	1376.05
wt	113.694	41.301	4695.71	93382	696, 002		wt	113.694	21.439	2437.46	48473	696, 002		wt	1.92647	4695.71	2437.46			0.000660616	0.000275358	0.248303
wt	110.023	38.106	4192.61	83377	696, 002		wt	110.023	19.646	2161.55	42986	696, 002		wt	1.93963	4192.61	2161.55
condition	Imp:Syp			condition	Imp corr.	condition	Syp corr.
wt	2.63505			wt	68.6219	wt	57.2224
wt	1.76664			wt	80.4	wt	100
wt	1.66085			wt	45.4275	wt	60.1007
wt	2.90897			wt	45.1688	wt	34.1185
wt	5.1064			wt	53.9313	wt	23.2069
wt	5.00423			wt	47.6029	wt	20.902
wt	2.21249			wt	56.747	wt	56.3576
wt	2.15645			wt	48.9238	wt	49.8508
wt	3.00174			wt	58.6707	wt	42.9477
wt	2.17435			wt	46.0749	wt	46.5615
wt	1.66572			wt	48.8999	wt	64.5055
wt	1.77552			wt	53.0481	wt	65.6502
wt	2.08529			wt	35.4546	wt	37.3592
wt	2.18553			wt	26.2247	wt	26.366
wt	2.26785			wt	47.9469	wt	46.4556
wt	1.64445			wt	48.1132	wt	64.2888
wt	5.64148			wt	42.2681	wt	16.4631
wt	1.5159			wt	40.2025	wt	58.2738
wt	1.3394			wt	52.8248	wt	86.66
wt	1.55707			wt	43.7718	wt	61.7701
wt	2.1169			wt	25.6184	wt	26.5915
wt	1.92647			wt	41.297	wt	47.1028
wt	1.93963			wt	36.8724	wt	41.7709
babo	3.19216			babo	100	babo	68.8346
babo	3.93719			babo	81.1996	babo	45.3167
babo	6.1029			babo	66.4368	babo	23.9202
babo	4.91179			babo	56.4418	babo	25.2495
babo	3.01186			babo	39.4033	babo	28.7468
babo	4.35731			babo	83.6514	babo	42.1839
babo	2.80733			babo	84.9153	babo	66.4636
babo	4.43729			babo	78.1362	babo	38.6924
babo	4.82247			babo	48.5333	babo	22.1137
t.test	0.000660616				0.000275358		0.248303
	***				***		ns
	*	**	***
	0.05	0.01	0.001
2.44732
4.17559

## Sheet: Figure 2-fig supp 1G-I
IMP in babo @ 1DAPF							SYP in babo @ 1DAPF						Condition	Imp:Syp	Imp	Syp		Condition	Imp:Syp	Imp	Syp
	Area	Mean	IntDen	RawIntDen	experiment			Area	Mean	IntDen	RawIntDen				IntDen	IntDen				IntDen	IntDen
babo	110.443	18.303	2021.43	44604	700, 005		babo	110.443	18.151	2004.7	44235		babo	1.00834	2021.43	2004.7		wt	0.378395	1347.8	3561.88
wt	90.548	14.885	1347.8	29740	700, 005		wt	90.548	39.337	3561.88	78595		wt	0.378395	1347.8	3561.88		wt	0.328682	1656.74	5040.56
wt	105.685	15.676	1656.74	36557	700, 005		wt	105.685	47.694	5040.56	111223		wt	0.328682	1656.74	5040.56		wt	0.33617	2452.69	7295.97
wt	88.056	27.854	2452.69	54120	700, 005		wt	88.056	82.856	7295.97	160990		wt	0.33617	2452.69	7295.97		wt	0.266531	1489.15	5587.16
wt	66.756	22.308	1489.15	32859	700, 005		wt	66.756	83.696	5587.16	123284		wt	0.266531	1489.15	5587.16		wt	0.348427	2262.57	6493.68
wt	117.287	19.291	2262.57	49925	700, 005		wt	117.287	55.366	6493.68	143287		wt	0.348427	2262.57	6493.68		wt	0.108935	1316.48	12085
																		wt	0.165381	1164.08	7038.74
babo	80.895	32.728	2647.56	58420	700, 004, bottom		babo	80.895	133.149	10771.1	237671		babo	0.245802	2647.56	10771.1		wt	0.250887	2067.88	8242.29
wt	88.917	14.806	1316.48	29049	700, 004, bottom		wt	88.917	135.914	12085	266663		wt	0.108935	1316.48	12085		wt	0.143373	2066.11	14410.7
wt	71.605	16.257	1164.08	25686	700, 004, bottom		wt	71.605	98.3	7038.74	155314		wt	0.165381	1164.08	7038.74		wt	0.269546	2089.77	7752.93
wt	100.926	20.489	2067.88	45629	700, 004, bottom		wt	100.926	81.666	8242.29	181871		wt	0.250887	2067.88	8242.29		wt	0.237263	1769.18	7456.63
																		wt	0.262172	2274.63	8676.08
babo	102.377	42.036	4303.53	94960	700, 004, top		babo	102.377	81.839	8378.38	184874		babo	0.513647	4303.53	8378.38		wt	0.34347	1903.6	5542.25
wt	103.283	20.004	2066.11	45590	700, 004, top		wt	103.283	139.527	14410.7	317981		wt	0.143373	2066.11	14410.7		wt	0.513404	1582.19	3081.77
wt	86.877	24.054	2089.77	46112	700, 004, top		wt	86.877	89.24	7752.93	171073		wt	0.269546	2089.77	7752.93		wt	0.202656	2570.7	12685
wt	88.735	19.938	1769.18	39038	700, 004, top		wt	88.735	84.032	7456.63	164535		wt	0.237263	1769.18	7456.63		wt	0.256497	2915.44	11366.4
																		wt	0.38948	2050.02	5263.49
babo	112.619	37.934	4272.03	94265	700, 003		babo	112.619	53.126	5983.02	132019		babo	0.714026	4272.03	5983.02		wt	0.645713	1372.36	2125.34
wt	105.186	21.625	2274.63	50191	700, 003		wt	105.186	82.483	8676.08	191443		wt	0.262172	2274.63	8676.08		wt	0.13089	1047.97	8006.45
wt	124.039	15.347	1903.6	42004	700, 003		wt	124.039	44.681	5542.25	122293		wt	0.34347	1903.6	5542.25		wt	0.0982736	1393.07	14175.5
wt	107.996	14.65	1582.19	34912	700, 003		wt	107.996	28.536	3081.77	68001		wt	0.513404	1582.19	3081.77		wt	0.296457	1618.95	5460.99
wt	145.838	17.627	2570.7	56724	700, 003		wt	145.838	86.98	12685	279903		wt	0.202656	2570.7	12685		wt	0.319881	1607.48	5025.24
wt	123.586	23.59	2915.44	64331	700, 003		wt	123.586	91.971	11366.4	250806		wt	0.256497	2915.44	11366.4		wt	0.214461	1048.46	4888.83
wt	132.922	15.423	2050.02	45235	700, 003		wt	132.922	39.598	5263.49	116142		wt	0.38948	2050.02	5263.49		wt	0.243439	1164.12	4781.97
wt	111.35	12.325	1372.36	30282	700, 003		wt	111.35	19.087	2125.34	46897		wt	0.645713	1372.36	2125.34		wt	0.104879	1778.42	16956.9
																		wt	0.151892	1446.23	9521.43
babo	117.241	15.745	1846	40733	700, 002		babo	117.241	39.063	4579.75	101055		babo	0.403078	1846	4579.75		wt	0.281219	1556.72	5535.63
babo	117.196	24.101	2824.53	62325	700, 002		babo	117.196	27.389	3209.84	70827		babo	0.879961	2824.53	3209.84		babo	1.00834	2021.43	2004.7
wt	107.135	9.782	1047.97	23124	700, 002		wt	107.135	74.732	8006.45	176667		wt	0.13089	1047.97	8006.45		babo	0.245802	2647.56	10771.1
wt	139.221	10.006	1393.07	30739	700, 002		wt	139.221	101.82	14175.5	312790		wt	0.0982736	1393.07	14175.5		babo	0.513647	4303.53	8378.38
wt	110.262	14.683	1618.95	35723	700, 002		wt	110.262	49.527	5460.99	120500		wt	0.296457	1618.95	5460.99		babo	0.714026	4272.03	5983.02
wt	125.127	12.847	1607.48	35470	700, 002		wt	125.127	40.161	5025.24	110885		wt	0.319881	1607.48	5025.24		babo	0.403078	1846	4579.75
wt	97.527	10.75	1048.46	23135	700, 002		wt	97.527	50.128	4888.83	107875		wt	0.214461	1048.46	4888.83		babo	0.879961	2824.53	3209.84
wt	100.065	11.634	1164.12	25687	700, 002		wt	100.065	47.788	4781.97	105517		wt	0.243439	1164.12	4781.97		babo	0.317294	3099.26	9767.78
babo	128.299	24.156	3099.26	68387	700, 001		babo	128.299	76.133	9767.78	215532		babo	0.317294	3099.26	9767.78			0.00011926	2.73773e-05	0.401438
wt	147.197	12.082	1778.42	39242	700, 001		wt	147.197	115.198	16956.9	374164		wt	0.104879	1778.42	16956.9
wt	147.379	9.813	1446.23	31912	700, 001		wt	147.379	64.605	9521.43	210096		wt	0.151892	1446.23	9521.43
wt	137.137	11.352	1556.72	34350	700, 001		wt	137.137	40.366	5535.63	122147		wt	0.281219	1556.72	5535.63
Condition	Imp:Syp	Imp	Syp	condition	Imp corr.	condition	Syp corr.
wt	0.378395	1347.8	3561.88	wt	31.3184	wt	21.0055
wt	0.328682	1656.74	5040.56	wt	38.4973	wt	29.7257
wt	0.33617	2452.69	7295.97	wt	56.9924	wt	43.0266
wt	0.266531	1489.15	5587.16	wt	34.603	wt	32.9492
wt	0.348427	2262.57	6493.68	wt	52.5748	wt	38.2952
wt	0.108935	1316.48	12085	wt	30.5908	wt	71.269
wt	0.165381	1164.08	7038.74	wt	27.0493	wt	41.5096
wt	0.250887	2067.88	8242.29	wt	48.0508	wt	48.6073
wt	0.143373	2066.11	14410.7	wt	48.0097	wt	84.9844
wt	0.269546	2089.77	7752.93	wt	48.5594	wt	45.7214
wt	0.237263	1769.18	7456.63	wt	41.1099	wt	43.974
wt	0.262172	2274.63	8676.08	wt	52.8549	wt	51.1655
wt	0.34347	1903.6	5542.25	wt	44.2334	wt	32.6843
wt	0.513404	1582.19	3081.77	wt	36.765	wt	18.1741
wt	0.202656	2570.7	12685	wt	59.7346	wt	74.8075
wt	0.256497	2915.44	11366.4	wt	67.7454	wt	67.031
wt	0.38948	2050.02	5263.49	wt	47.6358	wt	31.0404
wt	0.645713	1372.36	2125.34	wt	31.8892	wt	12.5338
wt	0.13089	1047.97	8006.45	wt	24.3513	wt	47.2164
wt	0.0982736	1393.07	14175.5	wt	32.3705	wt	83.597
wt	0.296457	1618.95	5460.99	wt	37.619	wt	32.2051
wt	0.319881	1607.48	5025.24	wt	37.3526	wt	29.6354
wt	0.214461	1048.46	4888.83	wt	24.3629	wt	28.8309
wt	0.243439	1164.12	4781.97	wt	27.0503	wt	28.2007
wt	0.104879	1778.42	16956.9	wt	41.3248	wt	100
wt	0.151892	1446.23	9521.43	wt	33.6057	wt	56.1508
wt	0.281219	1556.72	5535.63	wt	36.1731	wt	32.6453
babo	1.00834	2021.43	2004.7	babo	46.9713	babo	11.8223
babo	0.245802	2647.56	10771.1	babo	61.5206	babo	63.5205
babo	0.513647	4303.53	8378.38	babo	100	babo	49.4099
babo	0.714026	4272.03	5983.02	babo	99.2681	babo	35.2837
babo	0.403078	1846	4579.75	babo	42.8949	babo	27.0082
babo	0.879961	2824.53	3209.84	babo	65.6329	babo	18.9294
babo	0.317294	3099.26	9767.78	babo	72.0166	babo	57.6036
t.test	0.00011926	2.73773e-05	0.401438
0.26994
0.583164

## Sheet: Figure 2-fig supp 1J
	Imp	Syp		Imp	Syp												Imp in wt									Syp in wt
	IntDen	IntDen		IntDen	IntDen												L3 (wt)	7802.71								L3 (wt)	2961.13
wt @ L3	7802.71	2961.13	wt @ 24APF	1347.8	3561.88												L3 (wt)	9141.95								L3 (wt)	5174.77
wt @ L3	9141.95	5174.77	wt @ 24APF	1656.74	5040.56												L3 (wt)	5165.37								L3 (wt)	3110.07
wt @ L3	5165.37	3110.07	wt @ 24APF	2452.69	7295.97												L3 (wt)	5135.95								L3 (wt)	1765.55
wt @ L3	5135.95	1765.55	wt @ 24APF	1489.15	5587.16												L3 (wt)	6132.3								L3 (wt)	1200.9
wt @ L3	6132.3	1200.9	wt @ 24APF	2262.57	6493.68												L3 (wt)	5412.72								L3 (wt)	1081.63
wt @ L3	5412.72	1081.63	wt @ 24APF	1316.48	12085												L3 (wt)	6452.46								L3 (wt)	2916.38
wt @ L3	6452.46	2916.38	wt @ 24APF	1164.08	7038.74												L3 (wt)	5562.92								L3 (wt)	2579.67
wt @ L3	5562.92	2579.67	wt @ 24APF	2067.88	8242.29												L3 (wt)	6671.2								L3 (wt)	2222.44
wt @ L3	6671.2	2222.44	wt @ 24APF	2066.11	14410.7												L3 (wt)	5238.98								L3 (wt)	2409.45
wt @ L3	5238.98	2409.45	wt @ 24APF	2089.77	7752.93												L3 (wt)	5560.21								L3 (wt)	3338.01
wt @ L3	5560.21	3338.01	wt @ 24APF	1769.18	7456.63												L3 (wt)	6031.88								L3 (wt)	3397.25
wt @ L3	6031.88	3397.25	wt @ 24APF	2274.63	8676.08												L3 (wt)	4031.39								L3 (wt)	1933.25
wt @ L3	4031.39	1933.25	wt @ 24APF	1903.6	5542.25												L3 (wt)	2981.9								L3 (wt)	1364.38
wt @ L3	2981.9	1364.38	wt @ 24APF	1582.19	3081.77												L3 (wt)	5451.84								L3 (wt)	2403.97
wt @ L3	5451.84	2403.97	wt @ 24APF	2570.7	12685												L3 (wt)	5470.75								L3 (wt)	3326.8
wt @ L3	5470.75	3326.8	wt @ 24APF	2915.44	11366.4												L3 (wt)	4806.13								L3 (wt)	851.927
wt @ L3	4806.13	851.927	wt @ 24APF	2050.02	5263.49												L3 (wt)	4571.25								L3 (wt)	3015.54
wt @ L3	4571.25	3015.54	wt @ 24APF	1372.36	2125.34												L3 (wt)	6006.48								L3 (wt)	4484.46
wt @ L3	6006.48	4484.46	wt @ 24APF	1047.97	8006.45												L3 (wt)	4977.1								L3 (wt)	3196.46
wt @ L3	4977.1	3196.46	wt @ 24APF	1393.07	14175.5												L3 (wt)	2912.96								L3 (wt)	1376.05		wt comp	6.14638e-08
wt @ L3	2912.96	1376.05	wt @ 24APF	1618.95	5460.99												L3 (wt)	4695.71		wt comp	2.14845e-17					L3 (wt)	2437.46		mt comp	0.00230088
wt @ L3	4695.71	2437.46	wt @ 24APF	1607.48	5025.24												L3 (wt)	4192.61		mt comp	6.93232e-05					L3 (wt)	2161.55
wt @ L3	4192.61	2161.55	wt @ 24APF	1048.46	4888.83												24APF (wt)	1347.8								24APF (wt)	3561.88
babo @ L3	11370.6	3562.03	wt @ 24APF	1164.12	4781.97												24APF (wt)	1656.74								24APF (wt)	5040.56
babo @ L3	9232.87	2345.04	wt @ 24APF	1778.42	16956.9												24APF (wt)	2452.69								24APF (wt)	7295.97
babo @ L3	7554.25	1237.81	wt @ 24APF	1446.23	9521.43												24APF (wt)	1489.15								24APF (wt)	5587.16
babo @ L3	6417.77	1306.6	wt @ 24APF	1556.72	5535.63												24APF (wt)	2262.57								24APF (wt)	6493.68
babo @ L3	4480.39	1487.58	babo @ 24APF	2021.43	2004.7												24APF (wt)	1316.48								24APF (wt)	12085
babo @ L3	9511.65	2182.92	babo @ 24APF	2647.56	10771.1												24APF (wt)	1164.08								24APF (wt)	7038.74
babo @ L3	9655.36	3439.34	babo @ 24APF	4303.53	8378.38												24APF (wt)	2067.88								24APF (wt)	8242.29
babo @ L3	8884.54	2002.24	babo @ 24APF	4272.03	5983.02												24APF (wt)	2066.11								24APF (wt)	14410.7
babo @ L3	5518.52	1144.33	babo @ 24APF	1846	4579.75												24APF (wt)	2089.77								24APF (wt)	7752.93
			babo @ 24APF	2824.53	3209.84												24APF (wt)	1769.18								24APF (wt)	7456.63
			babo @ 24APF	3099.26	9767.78												24APF (wt)	2274.63								24APF (wt)	8676.08
																	24APF (wt)	1903.6								24APF (wt)	5542.25
																	24APF (wt)	1582.19								24APF (wt)	3081.77
																	24APF (wt)	2570.7								24APF (wt)	12685
																	24APF (wt)	2915.44								24APF (wt)	11366.4
																	24APF (wt)	2050.02								24APF (wt)	5263.49
																	24APF (wt)	1372.36								24APF (wt)	2125.34
																	24APF (wt)	1047.97								24APF (wt)	8006.45
																	24APF (wt)	1393.07								24APF (wt)	14175.5
																	24APF (wt)	1618.95								24APF (wt)	5460.99
																	24APF (wt)	1607.48								24APF (wt)	5025.24
																	24APF (wt)	1048.46								24APF (wt)	4888.83
																	24APF (wt)	1164.12								24APF (wt)	4781.97
																	24APF (wt)	1778.42								24APF (wt)	16956.9
																	24APF (wt)	1446.23								24APF (wt)	9521.43
																	24APF (wt)	1556.72								24APF (wt)	5535.63
																	L3 (babo)	11370.6								L3 (babo)	3562.03
																	L3 (babo)	9232.87								L3 (babo)	2345.04
																	L3 (babo)	7554.25								L3 (babo)	1237.81
																	L3 (babo)	6417.77								L3 (babo)	1306.6
																	L3 (babo)	4480.39								L3 (babo)	1487.58
																	L3 (babo)	9511.65								L3 (babo)	2182.92
																	L3 (babo)	9655.36								L3 (babo)	3439.34
																	L3 (babo)	8884.54								L3 (babo)	2002.24
																	L3 (babo)	5518.52								L3 (babo)	1144.33
																	24APF (babo)	2021.43								24APF (babo)	2004.7
																	24APF (babo)	2647.56								24APF (babo)	10771.1
																	24APF (babo)	4303.53								24APF (babo)	8378.38
																	24APF (babo)	4272.03								24APF (babo)	5983.02
																	24APF (babo)	1846								24APF (babo)	4579.75
																	24APF (babo)	2824.53								24APF (babo)	3209.84
																	24APF (babo)	3099.26								24APF (babo)	9767.78
																											0.00230088
