# Supplementary material for: Extrinsic activin signaling cooperates with an intrinsic temporal program to increase mushroom body neuronal diversity
Source: eLife. 2020 Jul 6;9:e58880. doi: 10.7554/eLife.58880 (PMC7365662; doi:10.7554/eLife.58880)
Supplement: Figure 3—source data 1. [file elife-58880-fig3-data1.xlsx]

## Sheet: Sheet1
`	percentage							condition	number of strong Mamo cells in clone	number of strong Mamo cells outside MB	total number of strong Mamo cells	experiment	percentage of strong Mamo in clone	percentage
wt	27.0677							wt	108	9	408	703, 002	0.270677	27.0677
wt	28.0193							wt	116	8	422	703, 001	0.280193	28.0193
wt	23.991							wt	107	6	452	704, 001	0.23991	23.991
wt	23.9514							wt	217	2	455	704, 002	0.239514	23.9514
wt	24.1706							wt	102	20	442	704, 003	0.241706	24.1706
wt	27.2222							wt	98	0	360	704, 004	0.272222	27.2222
wt	24.282							wt	93	6	389	704, 005	0.24282	24.282
UAS-babo-Act	34.2857							UAS-babo-Act	168	4	494	741, 003	0.342857	34.2857
UAS-babo-Act	32.9545							UAS-babo-Act	145	0	440	705, 007	0.329545	32.9545
UAS-babo-Act	28.0922							UAS-babo-Act	134	27	504	768, 003	0.280922	28.0922
UAS-babo-Act	32.7974							UAS-babo-Act	102	3	314	768, 002	0.327974	32.7974
average	32.0325
t.test	0.000948811
