# Supplementary material for: Extrinsic activin signaling cooperates with an intrinsic temporal program to increase mushroom body neuronal diversity
Source: eLife. 2020 Jul 6;9:e58880. doi: 10.7554/eLife.58880 (PMC7365662; doi:10.7554/eLife.58880)
Supplement: Figure 4—source data 1. [file elife-58880-fig4-data1.xlsx]

## Sheet: Sheet1
condition	Mamo++	Experiment
repo-Gal4 control	477	766, 010
repo-Gal4 control	428	766, 009
repo-Gal4 control	489	766, 008
repo-Gal4 control	495	766, 007
repo-Gal4 control	457	766, 006
repo-Gal4 control	331	766, 005
repo-Gal4 control	401	766, 004
repo-Gal4 control	403	766, 003
repo-Gal4 control	391	766, 002
repo-Gal4 control	417	766, 001
repo-Gal4>myo-RNAi	99	767, 009
repo-Gal4>myo-RNAi	114	767, 008
repo-Gal4>myo-RNAi	108	767, 007
repo-Gal4>myo-RNAi	177	767, 006
repo-Gal4>myo-RNAi	134	767, 005
repo-Gal4>myo-RNAi	103	767, 004
repo-Gal4>myo-RNAi	87	767, 003
repo-Gal4>myo-RNAi	59	767, 002, top
repo-Gal4>myo-RNAi	78	767, 002, bot
average wt	428.9
average mt	106.556
t.test	1.19541e-11
