# Supplementary material for: Extrinsic activin signaling cooperates with an intrinsic temporal program to increase mushroom body neuronal diversity
Source: eLife. 2020 Jul 6;9:e58880. doi: 10.7554/eLife.58880 (PMC7365662; doi:10.7554/eLife.58880)
Supplement: Figure 5—source data 1. [file elife-58880-fig5-data1.xlsx]

## Sheet: Sheet1
wt	27.0677																										condition	number of strong Mamo cells in clone	number of strong Mamo cells outside MB	total number of strong Mamo cells	experiment	percentage of strong Mamo in clone	percentage
wt	28.0193																										wt	108	9	408	703, 002	0.270677	27.0677
wt	23.991																										wt	116	8	422	703, 001	0.280193	28.0193
wt	23.9514																										wt	107	6	452	704, 001	0.23991	23.991
wt	24.1706																										wt	217	2	455	704, 002	0.239514	23.9514
wt	27.2222																										wt	102	20	442	704, 003	0.241706	24.1706
wt	24.282																										wt	98	0	360	704, 004	0.272222	27.2222
babo	1.18577																										wt	93	6	389	704, 005	0.24282	24.282
babo	0.70922																										babo	3	0	253	702, 001	0.0118577	1.18577
babo	1.79104																										babo	2	34	316	702, 002	0.0070922	0.70922
babo	2.4911																										babo	6	10	345	702, 003, top	0.0179104	1.79104
babo	3.27273																										babo	7	4	285	702, 003, bot	0.024911	2.4911
babo	1.87266																										babo	9	4	279	702, 004	0.0327273	3.27273
babo	2.46914																										babo	5	0	267	702, 005	0.0187266	1.87266
babo	3.82979																										babo	6	4	247	702, 006	0.0246914	2.46914
babo, UAS-babo	26.7943																										babo	9	14	249	702, 007	0.0382979	3.82979
babo, UAS-babo	24.4624																										babo, UAS-babo	112	20	438	707, 001	0.267943	26.7943
babo, UAS-babo	17.7273																										babo, UAS-babo	91	9	381	707, 005	0.244624	24.4624
babo, UAS-babo	27.7136																										babo, UAS-babo	78	1	441	707, 004	0.177273	17.7273
babo, UAS-babo	16.8168																										babo, UAS-babo	120	2	435	707, 003	0.277136	27.7136
babo, UAS-babo	13.2353																										babo, UAS-babo	56	15	348	707, 002	0.168168	16.8168
babo, UAS-Imp-RNAi	0																										babo, UAS-babo	63	71	547	684, 005	0.132353	13.2353
babo, UAS-Imp-RNAi	0																										babo, UAS-Imp-RNAi	0	81	392	753, 001	0	0
babo, UAS-Imp-RNAi	1.2																										babo, UAS-Imp-RNAi	0	0	273	753, 002	0	0
babo, UAS-Imp-RNAi	0																										babo, UAS-Imp-RNAi	3	0	250	754, 002, top	0.012	1.2
babo, UAS-Imp-RNAi	0																										babo, UAS-Imp-RNAi	0	3	289	754, 002, bot	0	0
babo, UAS-Imp-RNAi	0																										babo, UAS-Imp-RNAi	0	1	253	754, 003, top	0	0
babo, UAS-Imp-RNAi	0																										babo, UAS-Imp-RNAi	0	0	221	754, 003, bot	0	0
babo, UAS-Syp	1.60858																										babo, UAS-Imp-RNAi	0	3	301	754, 004, bot	0	0
babo, UAS-Syp	1.41844																										babo, UAS-Syp	6	3	376	687, 002	0.0160858	1.60858
babo, UAS-Syp	4.11985																										babo, UAS-Syp	4	5	287	713, 003, top	0.0141844	1.41844
babo, UAS-Syp	0.46729																										babo, UAS-Syp	11	5	272	713, 003, bot	0.0411985	4.11985
babo, UAS-Syp	0.696864																										babo, UAS-Syp	1	14	228	660, 006	0.0046729	0.46729
babo, UAS-Syp	1.55131																										babo, UAS-Syp	4	1	288	660, 004	0.00696864	0.696864
babo, UAS-Syp	2.80899																										babo, UAS-Syp	13	37	456	673, 007	0.0155131	1.55131
																											babo, UAS-Syp	5	11	189	673, 006	0.0280899	2.80899
