# Supplementary material for: Extrinsic activin signaling cooperates with an intrinsic temporal program to increase mushroom body neuronal diversity
Source: eLife. 2020 Jul 6;9:e58880. doi: 10.7554/eLife.58880 (PMC7365662; doi:10.7554/eLife.58880)
Supplement: Figure 6—source data 1. [file elife-58880-fig6-data1.xlsx]

## Sheet: Figure 6E
condition	number of strong Mamo cells in clone	number of strong Mamo cells outside MB	total number of strong Mamo cells	experiment	percentage of strong Mamo in clone	percentage
wt	108	9	408	703, 002	0.270677	27.0677
wt	116	8	422	703, 001	0.280193	28.0193
wt	107	6	452	704, 001	0.23991	23.991
wt	217	2	455	704, 002	0.239514	23.9514
wt	102	20	442	704, 003	0.241706	24.1706
wt	98	0	360	704, 004	0.272222	27.2222
wt	93	6	389	704, 005	0.24282	24.282
EcR-DN	17	13	356	669, 004	0.0495627	4.95627
EcR-DN	7	3	296	669, 003	0.0238908	2.38908
EcR-DN	16	3	291	669, 001	0.0555556	5.55556
EcR-DN	6	11	308	689, 001	0.020202	2.0202
EcR-DN	4	4	209	689, 002	0.0195122	1.95122
EcR-DN	11	2	334	689, 003	0.0331325	3.31325
wt	27.0677
wt	28.0193
wt	23.991
wt	23.9514
wt	24.1706
wt	27.2222
wt	24.282
EcR-DN	4.95627
EcR-DN	2.38908
EcR-DN	5.55556
EcR-DN	2.0202
EcR-DN	1.95122
EcR-DN	3.31325
	25.5292
	3.36426
t.test	9.68879e-11

## Sheet: Figure 6N
wt (mb-Gal4)	27.0677															condition	number of strong Mamo cells in clone	number of strong Mamo cells outside MB	total number of strong Mamo cells	experiment	percentage of strong Mamo in clone	percentage
wt (mb-Gal4)	28.0193															wt	108	9	408	703, 002	0.270677	27.0677
wt (mb-Gal4)	23.991															wt	116	8	422	703, 001	0.280193	28.0193
wt (mb-Gal4)	23.9514															wt	107	6	452	704, 001	0.23991	23.991
wt (mb-Gal4)	24.1706															wt	217	2	455	704, 002	0.239514	23.9514
wt (mb-Gal4)	27.2222															wt	102	20	442	704, 003	0.241706	24.1706
wt (mb-Gal4)	24.282															wt	98	0	360	704, 004	0.272222	27.2222
EcR-DN (mb-Gal4)	4.95627															wt	93	6	389	704, 005	0.24282	24.282
EcR-DN (mb-Gal4)	2.38908															EcR-DN	17	13	356	669, 004	0.0495627	4.95627
EcR-DN (mb-Gal4)	5.55556															EcR-DN	7	3	296	669, 003	0.0238908	2.38908
EcR-DN (mb-Gal4)	2.0202															EcR-DN	16	3	291	669, 001	0.0555556	5.55556
EcR-DN (mb-Gal4)	1.95122															EcR-DN	6	11	308	689, 001	0.020202	2.0202
EcR-DN (mb-Gal4)	3.31325															EcR-DN	4	4	209	689, 002	0.0195122	1.95122
EcR-DN (NB-Gal4)	24.5989															EcR-DN	11	2	334	689, 003	0.0331325	3.31325
EcR-DN (NB-Gal4)	25.4902															EcR-DN with NB-Gal4	92	4	378	701, 007	0.245989	24.5989
EcR-DN (NB-Gal4)	23.9535															EcR-DN with NB-Gal4	78	1	307	701, 006	0.254902	25.4902
EcR-DN (NB-Gal4)	20.9979															EcR-DN with NB-Gal4	103	6	436	701, 005	0.239535	23.9535
EcR-DN (NB-Gal4)	34															EcR-DN with NB-Gal4	101	3	484	701, 003	0.209979	20.9979
EcR-DN (NB-Gal4)	18.6224															EcR-DN with NB-Gal4	102	0	300	701, 004, top	0.34	34
																EcR-DN with NB-Gal4	73	11	403	701, 004, bot	0.186224	18.6224
25.5292
3.36426
24.6105

## Sheet: Figure 6-fig supp 6J
wt	27.0677																														condition	number of strong Mamo cells in clone	number of strong Mamo cells outside MB	total number of strong Mamo cells	experiment	percentage of strong Mamo in clone	percentage
wt	28.0193																														wt	108	9	408	703, 002	0.270677	27.0677
wt	23.991																														wt	116	8	422	703, 001	0.280193	28.0193
wt	23.9514																														wt	107	6	452	704, 001	0.23991	23.991
wt	24.1706																														wt	217	2	455	704, 002	0.239514	23.9514
wt	27.2222																														wt	102	20	442	704, 003	0.241706	24.1706
wt	24.282																														wt	98	0	360	704, 004	0.272222	27.2222
babo	1.18577																														wt	93	6	389	704, 005	0.24282	24.282
babo	0.70922																														babo	3	0	253	702, 001	0.0118577	1.18577
babo	1.79104																														babo	2	34	316	702, 002	0.0070922	0.70922
babo	2.4911																														babo	6	10	345	702, 003, top	0.0179104	1.79104
babo	3.27273																														babo	7	4	285	702, 003, bot	0.024911	2.4911
babo	1.87266																														babo	9	4	279	702, 004	0.0327273	3.27273
babo	2.46914																														babo	5	0	267	702, 005	0.0187266	1.87266
babo	3.82979																														babo	6	4	247	702, 006	0.0246914	2.46914
babo, UAS-babo	26.7943																														babo	9	14	249	702, 007	0.0382979	3.82979
babo, UAS-babo	24.4624																														babo, UAS-babo	112	20	438	707, 001	0.267943	26.7943
babo, UAS-babo	17.7273																														babo, UAS-babo	91	9	381	707, 005	0.244624	24.4624
babo, UAS-babo	27.7136																														babo, UAS-babo	78	1	441	707, 004	0.177273	17.7273
babo, UAS-babo	16.8168																														babo, UAS-babo	120	2	435	707, 003	0.277136	27.7136
babo, UAS-babo	13.2353																														babo, UAS-babo	56	15	348	707, 002	0.168168	16.8168
babo, UAS-EcR	3.85852																														babo, UAS-babo	63	71	547	684, 005	0.132353	13.2353
babo, UAS-EcR	3.79939																														babo, UAS-EcR	12	2	313	706, 001	0.0385852	3.85852
babo, UAS-EcR	6.97674																														babo, UAS-EcR	25	5	334	706, 003	0.0379939	3.79939
babo, UAS-EcR	4.5584																														babo, UAS-EcR	30	3	218	706, 005	0.0697674	6.97674
babo, UAS-EcR	4.24242																														babo, UAS-EcR	16	8	359	706, 007, top	0.045584	4.5584
babo, UAS-EcR	2.7027																														babo, UAS-EcR	14	4	334	706, 007, bot	0.0424242	4.24242
babo, UAS-EcR	4.45205																														babo, UAS-EcR	12	9	453	706, 006	0.027027	2.7027
babo, UAS-EcR	4.3956																														babo, UAS-EcR	13	0	292	685, 004	0.0445205	4.45205
																															babo, UAS-EcR	32	0	364	685, 005	0.043956	4.3956
