# Supplementary material for: Extrinsic activin signaling cooperates with an intrinsic temporal program to increase mushroom body neuronal diversity
Source: eLife. 2020 Jul 6;9:e58880. doi: 10.7554/eLife.58880 (PMC7365662; doi:10.7554/eLife.58880)
Supplement: Figure 6—source data 2. [file elife-58880-fig6-data2.xlsx]

## Sheet: Sheet1
IMP in EcR-DN @ L3							SYP in EcR-DN @ L3							Condition	Imp:Syp	Imp	Syp		Condition	Imp:Syp	Imp	Syp		Condition	Imp			Condition	Syp
	Area	Mean	IntDen	RawIntDen	experiment			Area	Mean	IntDen	RawIntDen	experiment				IntDen	IntDen				IntDen	IntDen			IntDen	corr.			IntDen	corr.
EcR-DN	75.14	55.323	4156.92	91725	699, 004		EcR-DN	75.14	36.931	2775	61232	699, 004		EcR-DN	1.49799	4156.92	2775		wt	1.15444	5134.28	4447.42		wt	5134.28	63.4925		wt	4447.42	44.9264
wt	98.434	52.16	5134.28	113291	699, 004		wt	98.434	45.182	4447.42	98135	699, 004		wt	1.15444	5134.28	4447.42		wt	1.68865	3588.35	2124.98		wt	3588.35	44.3749		wt	2124.98	21.4659
wt	84.339	42.546	3588.35	79179	699, 004		wt	84.339	25.196	2124.98	46889	699, 004		wt	1.68865	3588.35	2124.98		wt	0.966982	4299	4445.79		wt	4299	53.1631		wt	4445.79	44.9099
wt	90.729	47.383	4299	94860	699, 004		wt	90.729	49	4445.79	98099	699, 004		wt	0.966982	4299	4445.79		wt	1.03732	4334.12	4178.18		wt	4334.12	53.5975		wt	4178.18	42.2066
wt	95.307	45.476	4334.12	95635	699, 004		wt	95.307	43.839	4178.18	92194	699, 004		wt	1.03732	4334.12	4178.18		wt	1.11138	6077.52	5468.42		wt	6077.52	75.1569		wt	5468.42	55.2402
wt	94.763	64.134	6077.52	134104	699, 004		wt	94.763	57.706	5468.42	120664	699, 004		wt	1.11138	6077.52	5468.42		wt	1.65885	5393.51	3251.35		wt	5393.51	66.6982		wt	3251.35	32.8441
wt	100.201	53.827	5393.51	119011	699, 004		wt	100.201	32.448	3251.35	71743	699, 004		wt	1.65885	5393.51	3251.35		wt	1.34926	3910.88	2898.54		wt	3910.88	48.3635		wt	2898.54	29.2801
wt	92.406	42.323	3910.88	86296	699, 004		wt	92.406	31.367	2898.54	63958	699, 004		wt	1.34926	3910.88	2898.54		wt	2.55622	8086.43	3163.43		wt	8086.43	100		wt	3163.43	31.956
																			wt	1.94539	4875.92	2506.39		wt	4875.92	60.2975		wt	2506.39	25.3187
EcR-DN	51.709	36.885	1907.31	42086	699, 003		EcR-DN	51.709	11.444	591.781	13058	699, 003		EcR-DN	3.223	1907.31	591.781		wt	8.50657	4017.43	472.274		wt	4017.43	49.6811		wt	472.274	4.77076
wt	103.872	77.85	8086.43	178432	699, 003		wt	103.872	30.455	3163.43	69803	699, 003		wt	2.55622	8086.43	3163.43		wt	1.30735	7835.45	5993.4		wt	7835.45	96.8963		wt	5993.4	60.5434
wt	94.763	51.454	4875.92	107590	699, 003		wt	94.763	26.449	2506.39	55305	699, 003		wt	1.94539	4875.92	2506.39		wt	1.36021	7714.05	5671.23		wt	7714.05	95.3949		wt	5671.23	57.2889
wt	71.151	56.463	4017.43	88647	699, 003		wt	71.151	6.638	472.274	10421	699, 003		wt	8.50657	4017.43	472.274		wt	1.87918	5920.21	3150.43		wt	5920.21	73.2116		wt	3150.43	31.8246
wt	109.401	71.621	7835.45	172894	699, 003		wt	109.401	54.784	5993.4	132248	699, 003		wt	1.30735	7835.45	5993.4		wt	1.23618	6936.86	5611.54		wt	6936.86	85.7839		wt	5611.54	56.686
wt	102.875	74.985	7714.05	170215	699, 003		wt	102.875	55.127	5671.23	125139	699, 003		wt	1.36021	7714.05	5671.23		wt	0.842008	3720.72	4418.87		wt	3720.72	46.0119		wt	4418.87	44.638
wt	110.625	53.516	5920.21	130633	699, 003		wt	110.625	28.478	3150.43	69516	699, 003		wt	1.87918	5920.21	3150.43		wt	1.76562	3607.15	2043		wt	3607.15	44.6075		wt	2043	20.6377
wt	111.078	62.45	6936.86	153066	699, 003		wt	111.078	50.519	5611.54	123822	699, 003		wt	1.23618	6936.86	5611.54		wt	3.45692	3176.39	918.851		wt	3176.39	39.2805		wt	918.851	9.28194
																			wt	0.97316	6551.28	6731.97		wt	6551.28	81.0157		wt	6731.97	68.0042
EcR-DN	140.807	37.839	5328.07	117567	699, 002		EcR-DN	140.807	28.439	4004.47	88361	699, 002		EcR-DN	1.33053	5328.07	4004.47		wt	0.612937	6067.68	9899.35		wt	6067.68	75.0353		wt	9899.35	100
wt	112.8	32.985	3720.72	82100	699, 002		wt	112.8	39.174	4418.87	97505	699, 002		wt	0.842008	3720.72	4418.87		wt	0.682635	3570.49	5230.45		wt	3570.49	44.1541		wt	5230.45	52.8363
wt	107.77	33.471	3607.15	79594	699, 002		wt	107.77	18.957	2043	45080	699, 002		wt	1.76562	3607.15	2043		wt	1.54986	6221.77	4014.39		wt	6221.77	76.9408		wt	4014.39	40.5521
wt	149.418	21.258	3176.39	70089	699, 002		wt	149.418	6.15	918.851	20275	699, 002		wt	3.45692	3176.39	918.851		wt	2.33143	6171.64	2647.15		wt	6171.64	76.321		wt	2647.15	26.7407
wt	123.586	53.01	6551.28	144558	699, 002		wt	123.586	54.472	6731.97	148545	699, 002		wt	0.97316	6551.28	6731.97		wt	2.31339	4613.97	1994.46		wt	4613.97	57.0582		wt	1994.46	20.1474
wt	127.166	47.715	6067.68	133887	699, 002		wt	127.166	77.846	9899.35	218435	699, 002		wt	0.612937	6067.68	9899.35		wt	1.00097	3934.95	3931.14		wt	3934.95	48.6611		wt	3931.14	39.7111
wt	85.88	41.575	3570.49	78785	699, 002		wt	85.88	60.904	5230.45	115413	699, 002		wt	0.682635	3570.49	5230.45		wt	1.32693	5312.98	4003.97		wt	5312.98	65.7023		wt	4003.97	40.4468
																			wt	1.16663	5547.64	4755.28		wt	5547.64	68.6043		wt	4755.28	48.0363
EcR-DN	102.558	49.334	5059.55	111642	699, 001		EcR-DN	102.558	11.802	1210.39	26708	699, 001		EcR-DN	4.1801	5059.55	1210.39		wt	1.14256	5331.06	4665.91		wt	5331.06	65.926		wt	4665.91	47.1335
wt	132.605	46.92	6221.77	137287	699, 001		wt	132.605	30.273	4014.39	88580	699, 001		wt	1.54986	6221.77	4014.39		EcR-DN	1.49799	4156.92	2775		EcR-DN	4156.92	51.4061		EcR-DN	2775	28.0321
wt	131.154	47.056	6171.64	136181	699, 001		wt	131.154	20.183	2647.15	58411	699, 001		wt	2.33143	6171.64	2647.15		EcR-DN	3.223	1907.31	591.781		EcR-DN	1907.31	23.5866		EcR-DN	591.781	5.97798
wt	107.452	42.94	4613.97	101810	699, 001		wt	107.452	18.561	1994.46	44009	699, 001		wt	2.31339	4613.97	1994.46		EcR-DN	1.33053	5328.07	4004.47		EcR-DN	5328.07	65.889		EcR-DN	4004.47	40.4519
wt	106.093	37.09	3934.95	86827	699, 001		wt	106.093	37.054	3931.14	86743	699, 001		wt	1.00097	3934.95	3931.14		EcR-DN	4.1801	5059.55	1210.39		EcR-DN	5059.55	62.5684		EcR-DN	1210.39	12.227
wt	127.076	41.81	5312.98	117234	699, 001		wt	127.076	31.509	4003.97	88350	699, 001		wt	1.32693	5312.98	4003.97
wt	121.365	45.71	5547.64	122412	699, 001		wt	121.365	39.181	4755.28	104928	699, 001		wt	1.16663	5547.64	4755.28			0.310057	0.14356	0.0751526
wt	139.267	38.28	5331.06	117633	699, 001		wt	139.267	33.503	4665.91	102956	699, 001		wt	1.14256	5331.06	4665.91
Condition	Imp:Syp	Imp	Syp	condition	Imp corr.	condition	Syp corr.
wt	1.15444	5134.28	4447.42	wt	63.4925	wt	44.9264
wt	1.68865	3588.35	2124.98	wt	44.3749	wt	21.4659
wt	0.966982	4299	4445.79	wt	53.1631	wt	44.9099
wt	1.03732	4334.12	4178.18	wt	53.5975	wt	42.2066
wt	1.11138	6077.52	5468.42	wt	75.1569	wt	55.2402
wt	1.65885	5393.51	3251.35	wt	66.6982	wt	32.8441
wt	1.34926	3910.88	2898.54	wt	48.3635	wt	29.2801
wt	2.55622	8086.43	3163.43	wt	100	wt	31.956
wt	1.94539	4875.92	2506.39	wt	60.2975	wt	25.3187
wt	8.50657	4017.43	472.274	wt	49.6811	wt	4.77076
wt	1.30735	7835.45	5993.4	wt	96.8963	wt	60.5434
wt	1.36021	7714.05	5671.23	wt	95.3949	wt	57.2889
wt	1.87918	5920.21	3150.43	wt	73.2116	wt	31.8246
wt	1.23618	6936.86	5611.54	wt	85.7839	wt	56.686
wt	0.842008	3720.72	4418.87	wt	46.0119	wt	44.638
wt	1.76562	3607.15	2043	wt	44.6075	wt	20.6377
wt	3.45692	3176.39	918.851	wt	39.2805	wt	9.28194
wt	0.97316	6551.28	6731.97	wt	81.0157	wt	68.0042
wt	0.612937	6067.68	9899.35	wt	75.0353	wt	100
wt	0.682635	3570.49	5230.45	wt	44.1541	wt	52.8363
wt	1.54986	6221.77	4014.39	wt	76.9408	wt	40.5521
wt	2.33143	6171.64	2647.15	wt	76.321	wt	26.7407
wt	2.31339	4613.97	1994.46	wt	57.0582	wt	20.1474
wt	1.00097	3934.95	3931.14	wt	48.6611	wt	39.7111
wt	1.32693	5312.98	4003.97	wt	65.7023	wt	40.4468
wt	1.16663	5547.64	4755.28	wt	68.6043	wt	48.0363
wt	1.14256	5331.06	4665.91	wt	65.926	wt	47.1335
EcR-DN	1.49799	4156.92	2775	EcR-DN	51.4061	EcR-DN	28.0321
EcR-DN	3.223	1907.31	591.781	EcR-DN	23.5866	EcR-DN	5.97798
EcR-DN	1.33053	5328.07	4004.47	EcR-DN	65.889	EcR-DN	40.4519
EcR-DN	4.1801	5059.55	1210.39	EcR-DN	62.5684	EcR-DN	12.227
t.test	0.310057	0.14356	0.0751526
1.73789
2.55791
