# Supplementary material for: Extrinsic activin signaling cooperates with an intrinsic temporal program to increase mushroom body neuronal diversity
Source: eLife journal article supplement (doi:10.7554/elife.58880), 2020-07-06
Supplement: supp [file elife-58880-supp-v1.zip]

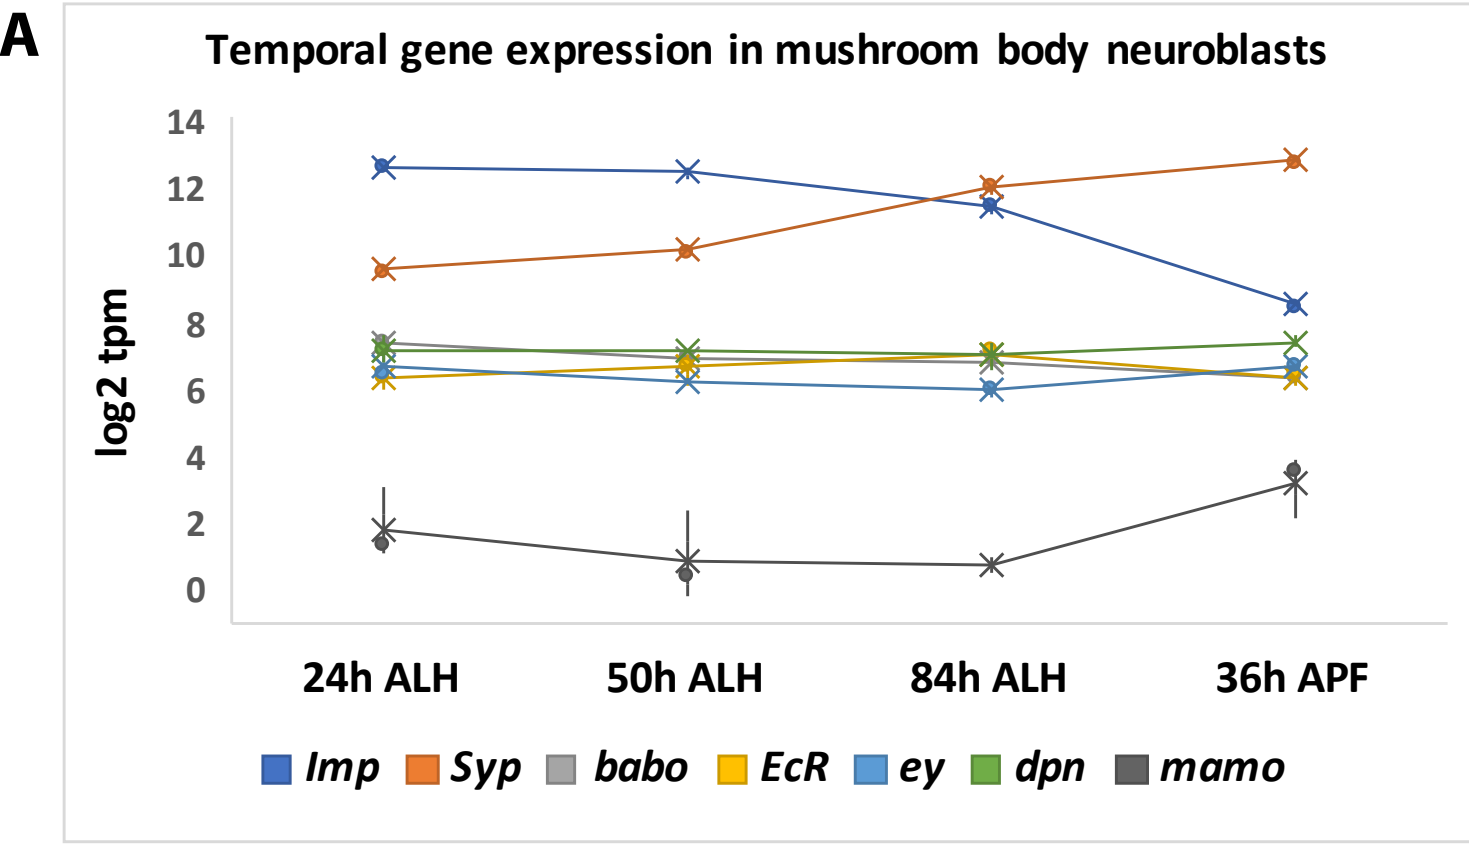

**Wandering L3: *mb-Gal4* MARCM neuroblast clones induced at L1**

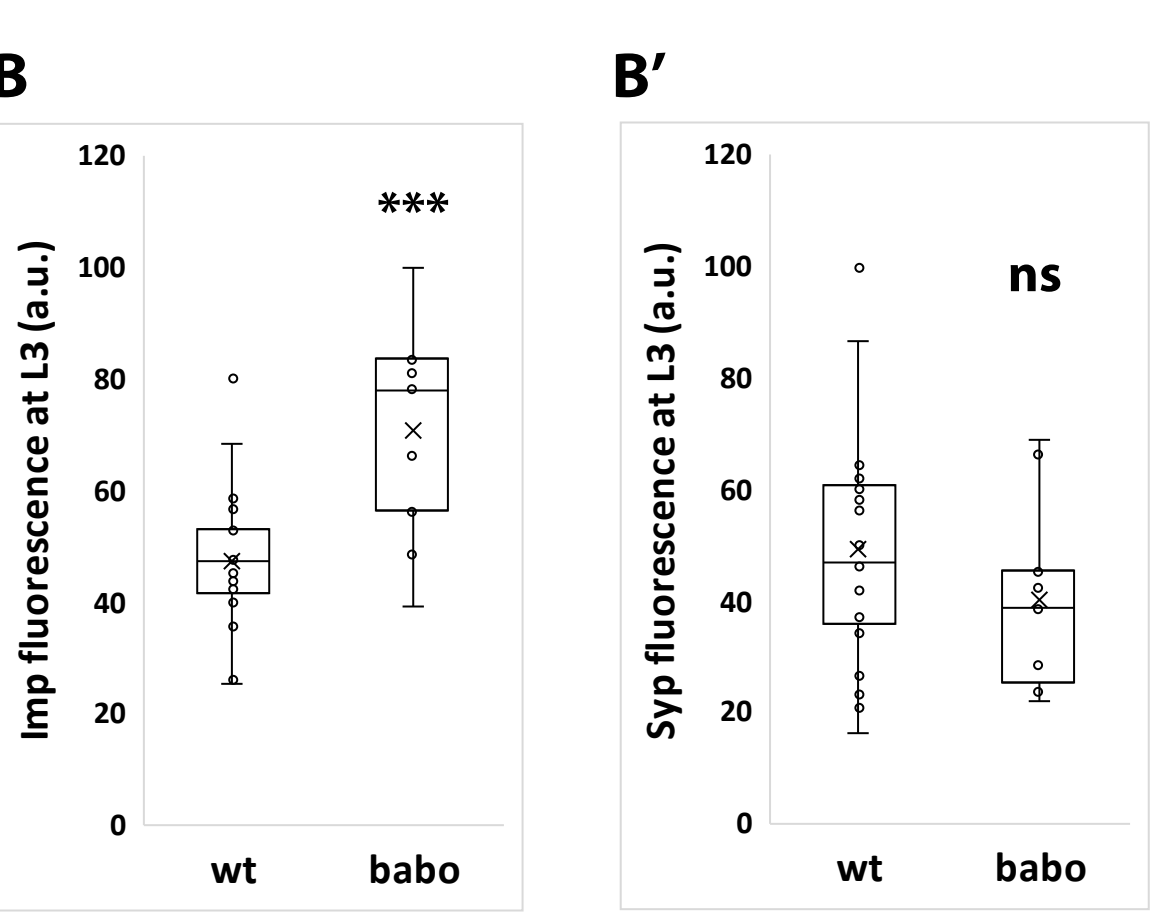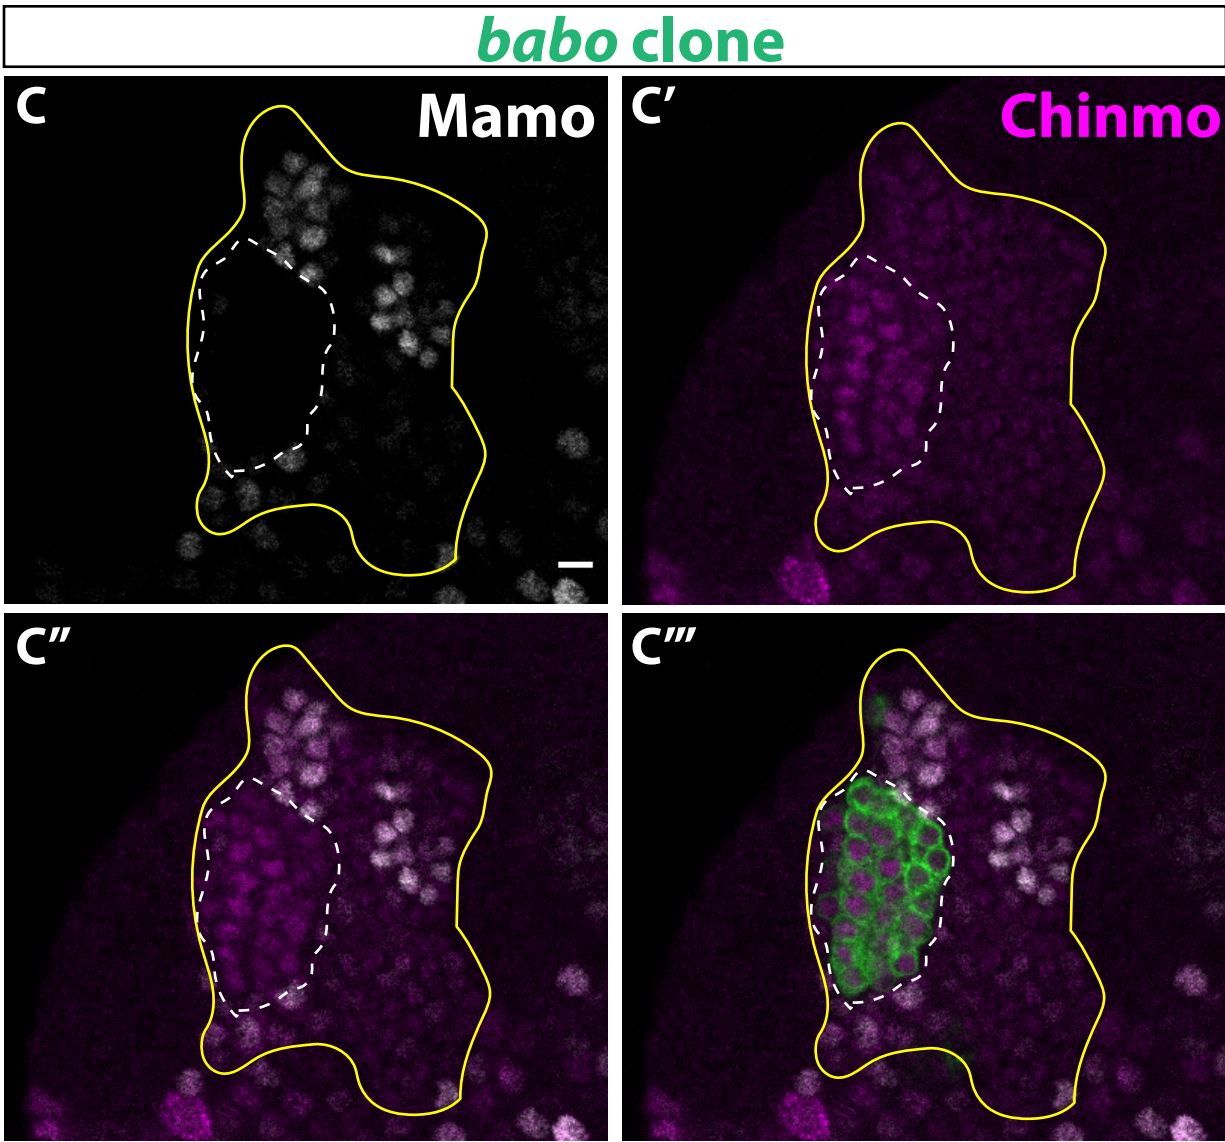

**~24 hours APF: *mb-Gal4* MARCM neuroblast clones induced at L1**

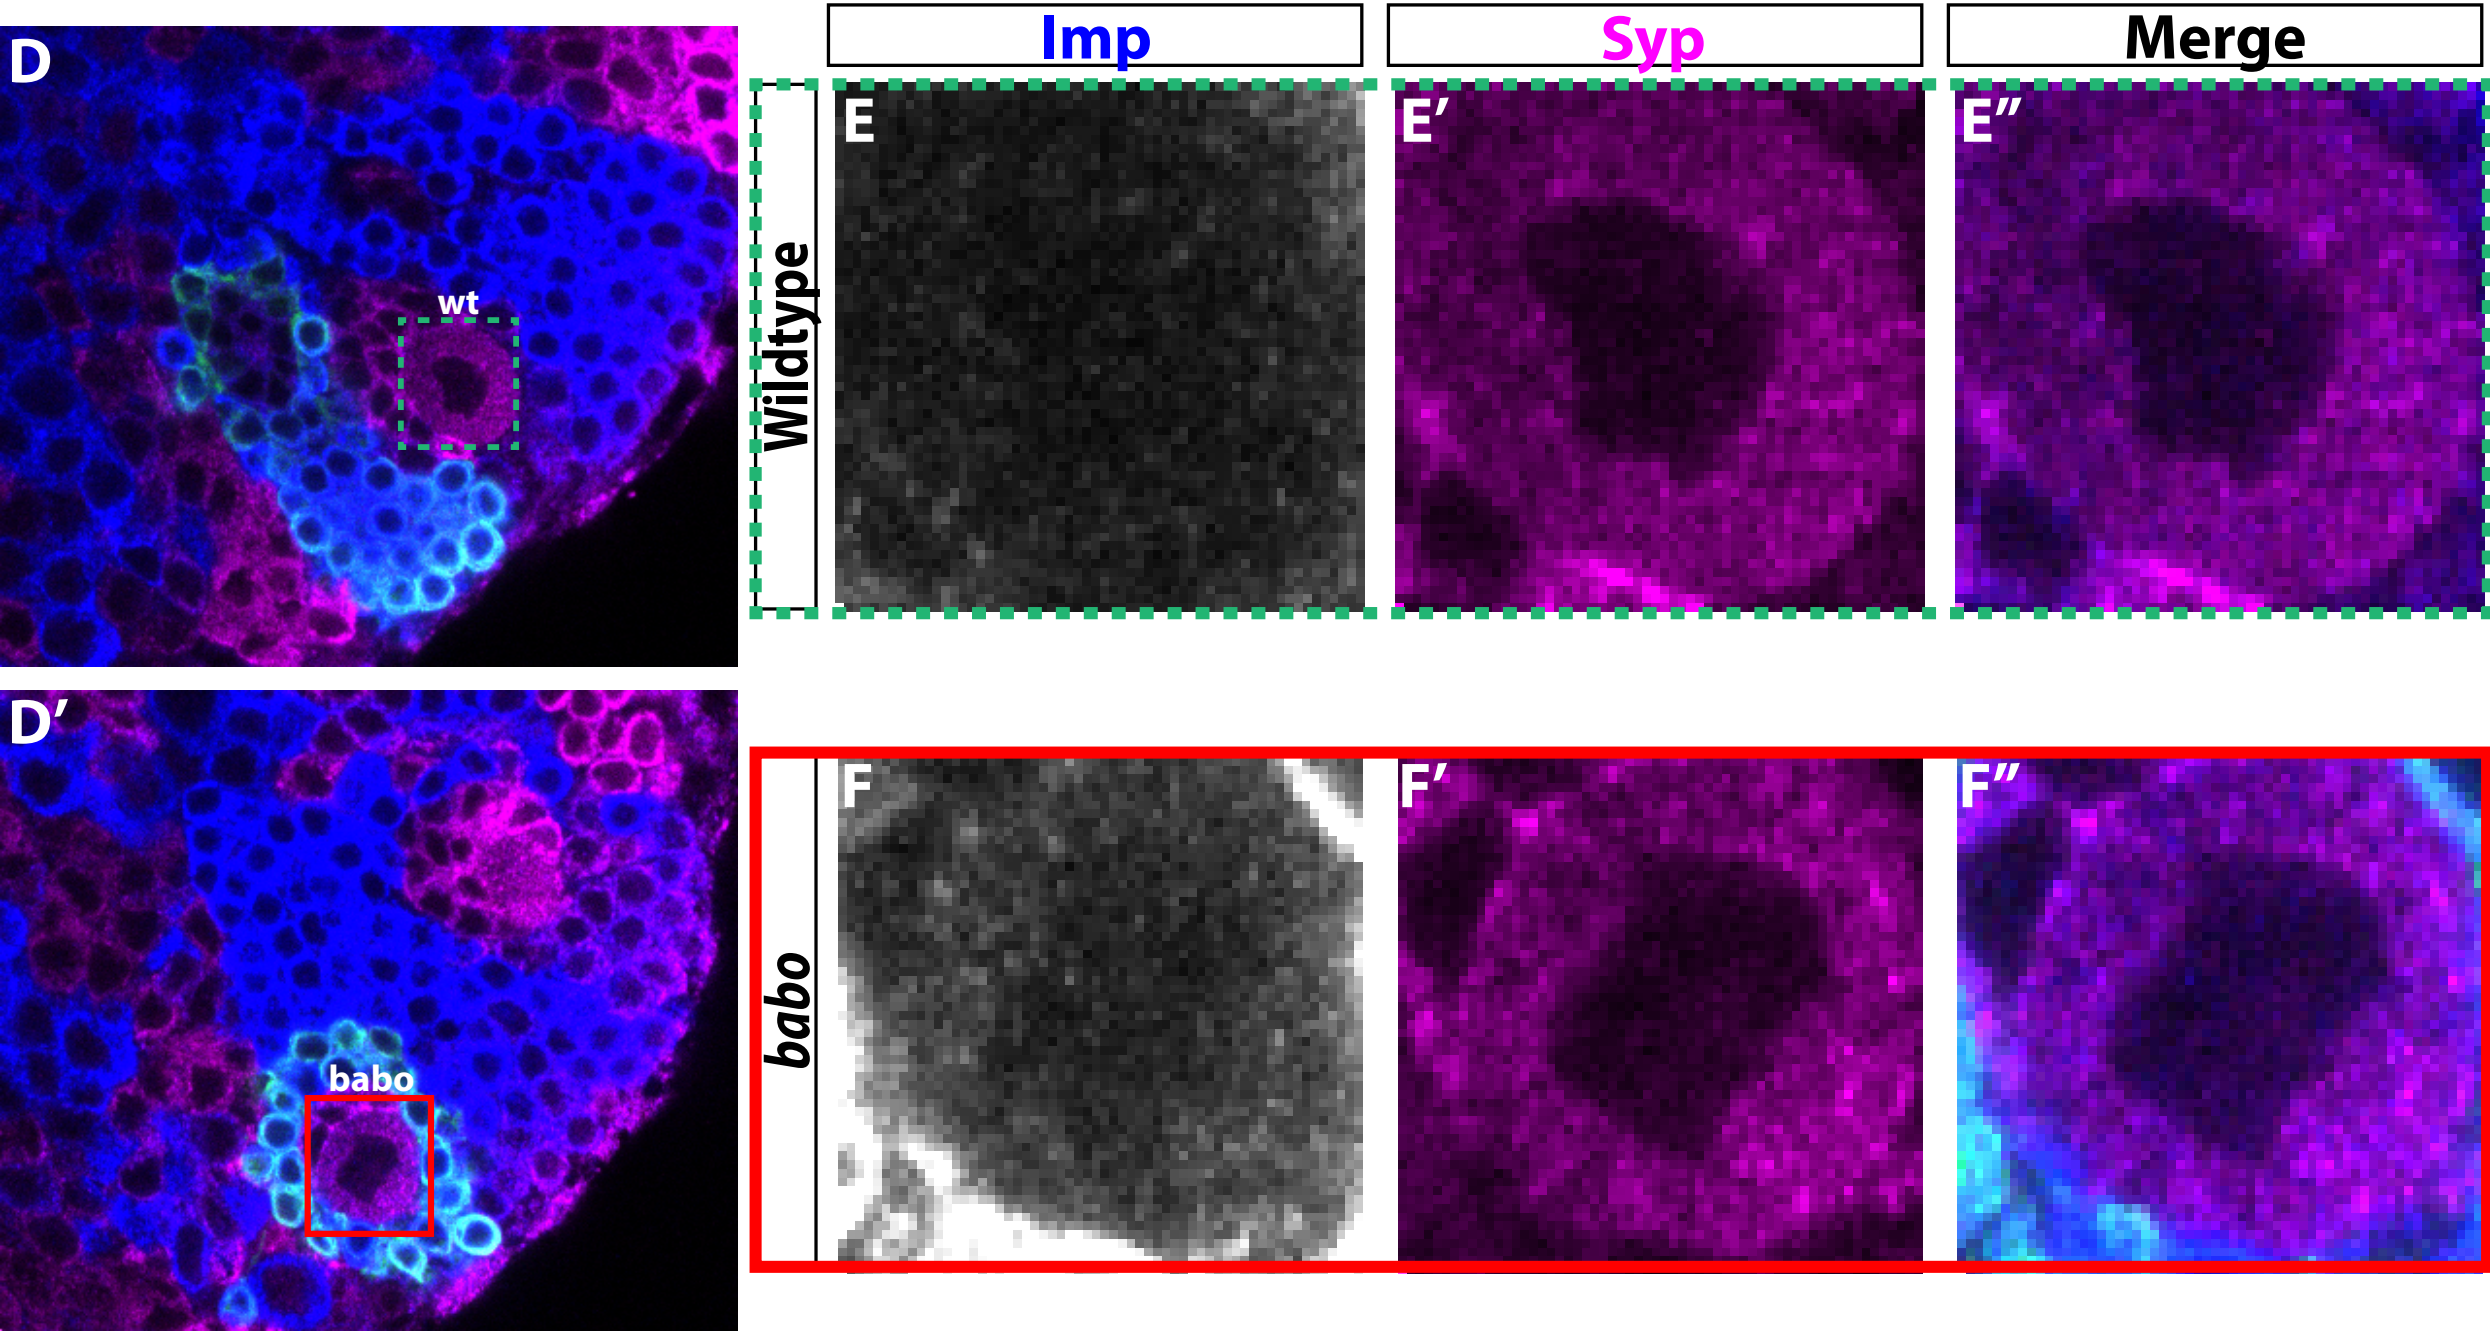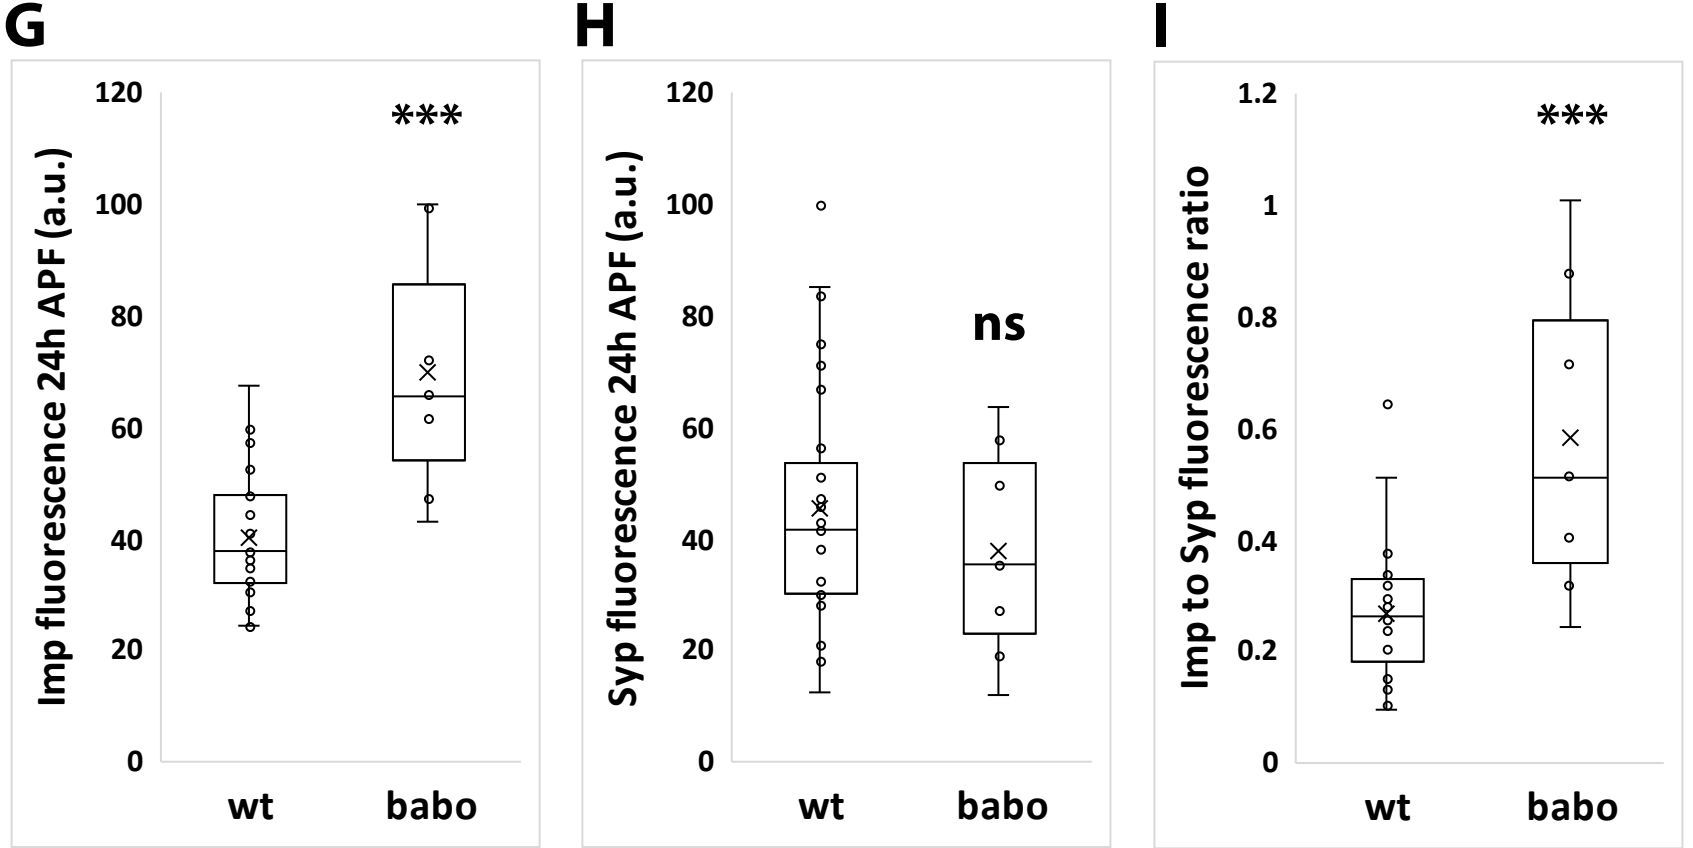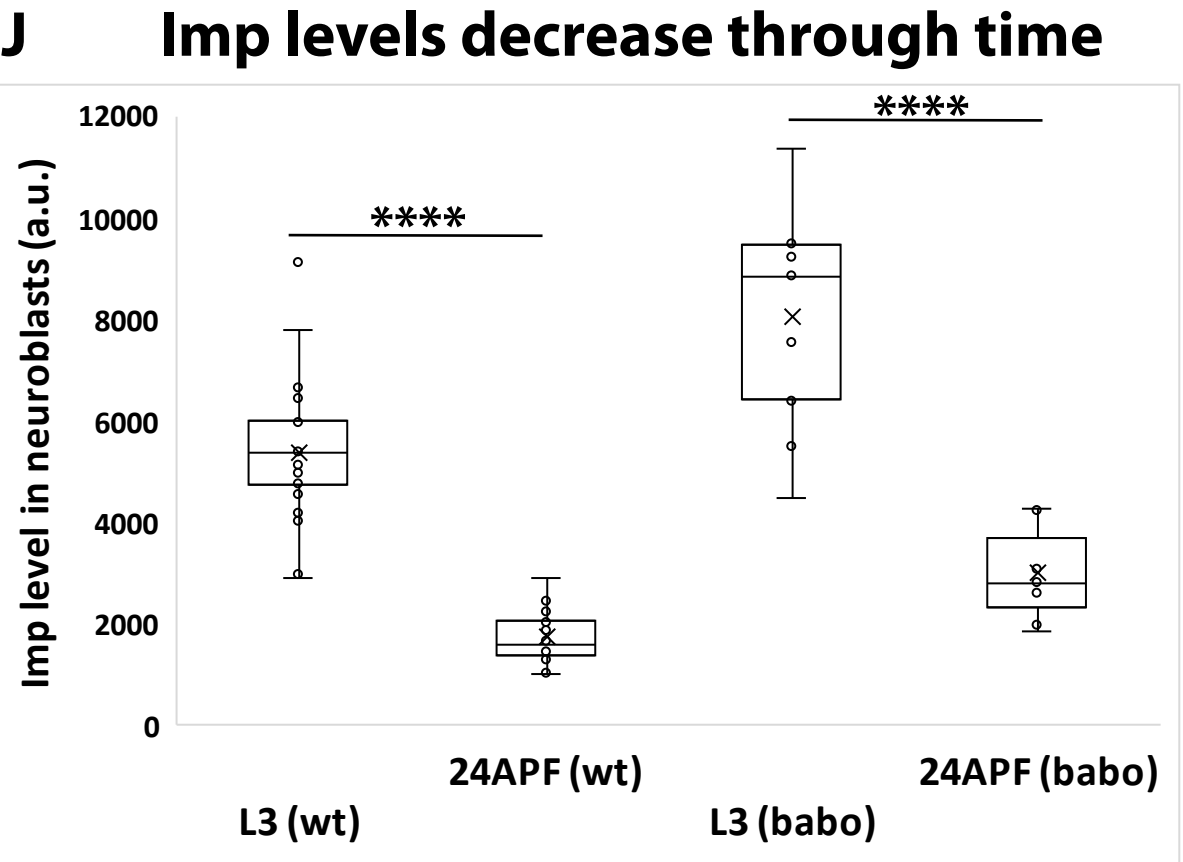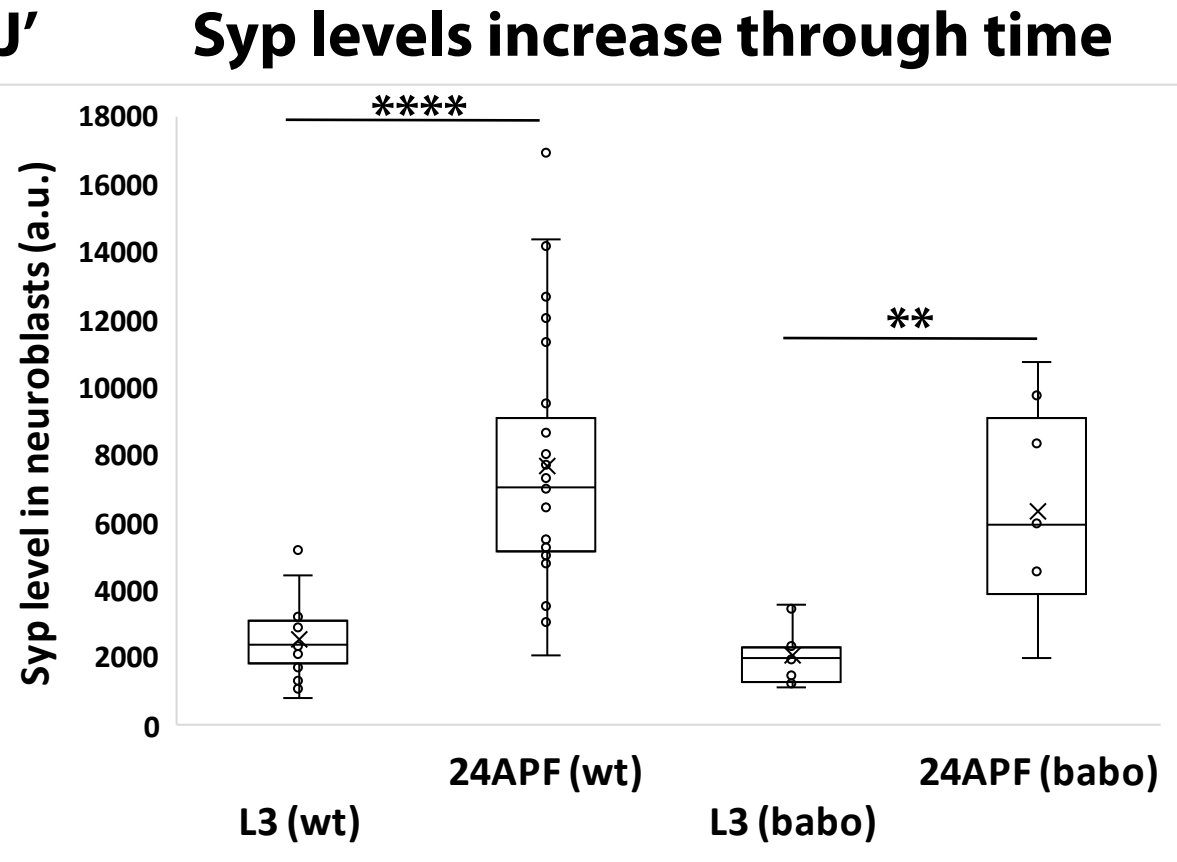

***babo* GMC clones induced at L3**

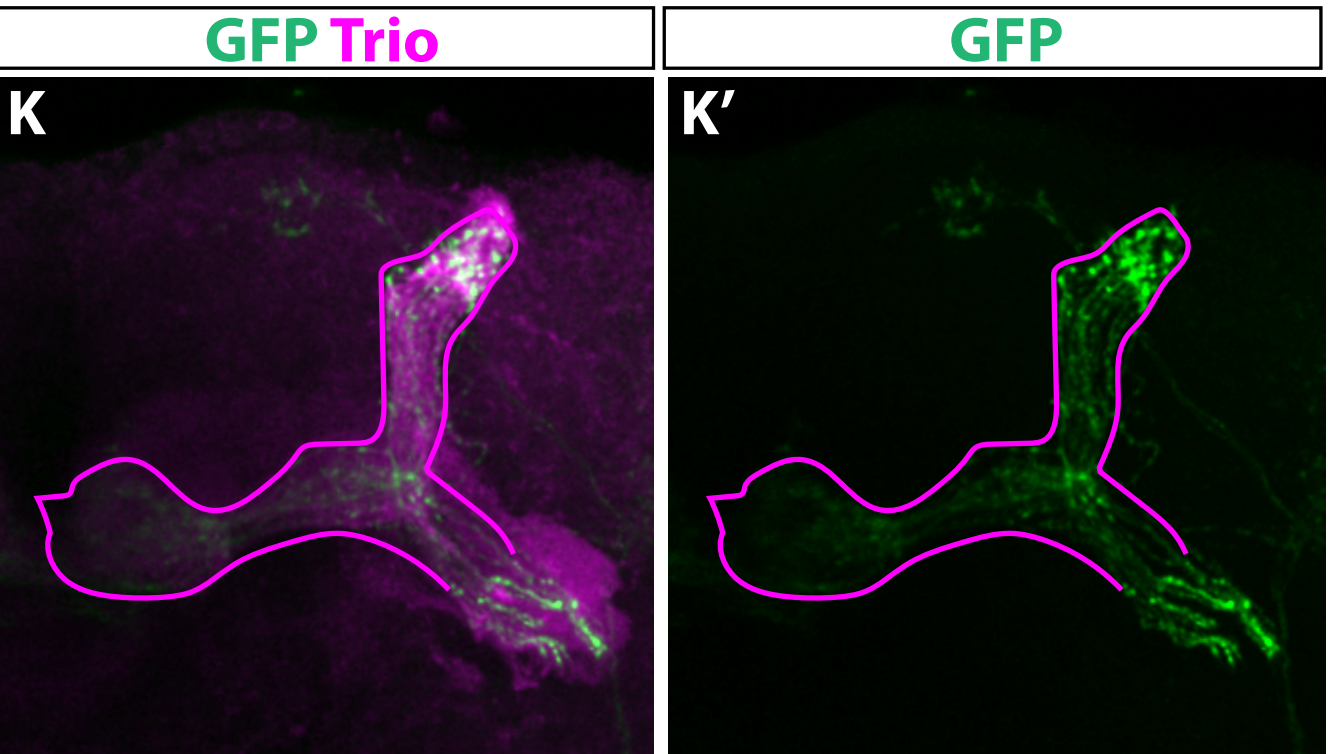

***babo* GMC clones induced at L1**

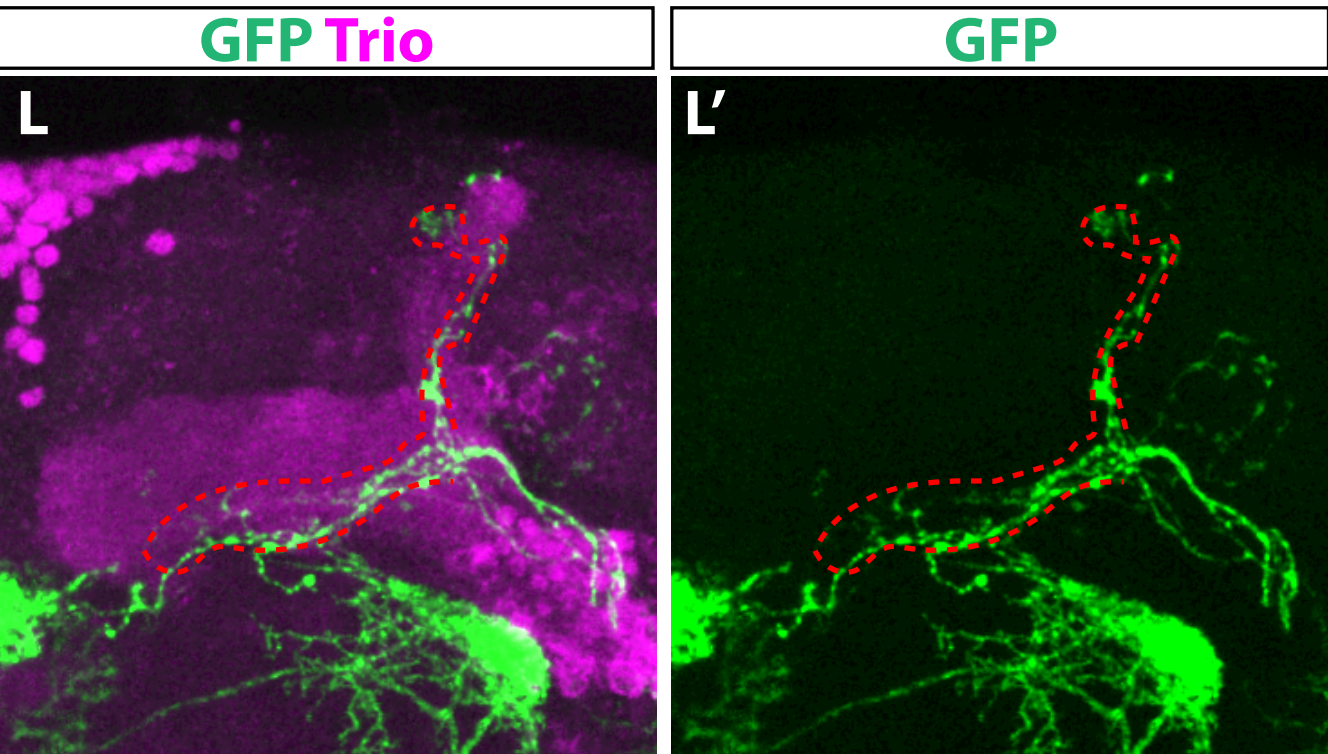

**Adult axonal morphology:  $\gamma$ ,  $\alpha'\beta'$**
