# Supplementary material for: Extrinsic activin signaling cooperates with an intrinsic temporal program to increase mushroom body neuronal diversity
Source: eLife journal article supplement (doi:10.7554/elife.58880), 2020-07-06

Adult: *mb-Gal4* MARCM neuroblast clones induced at L1

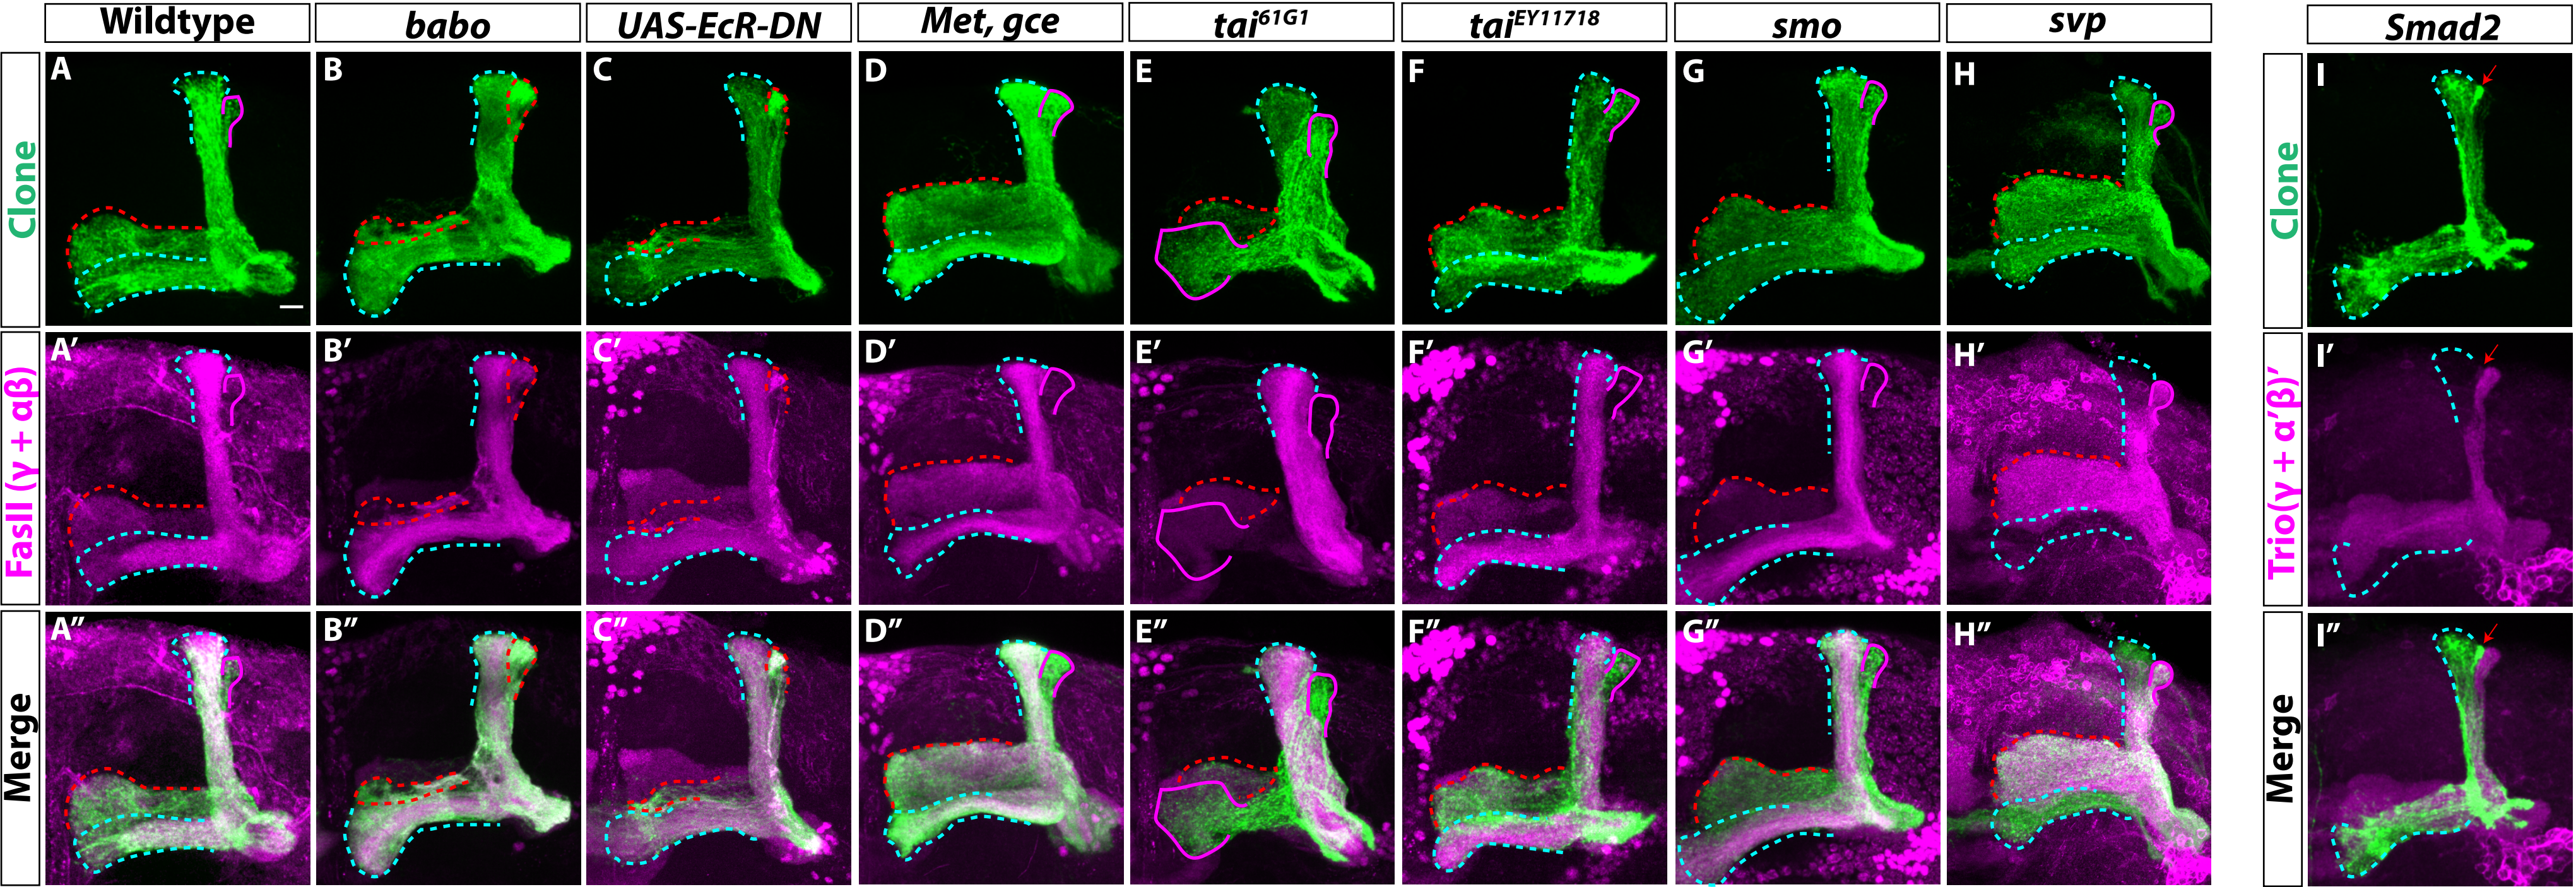

Adult axonal morphology: γ, α'β', αβ

Adult: *mb-Gal4* MARCM neuroblast clones induced at L1

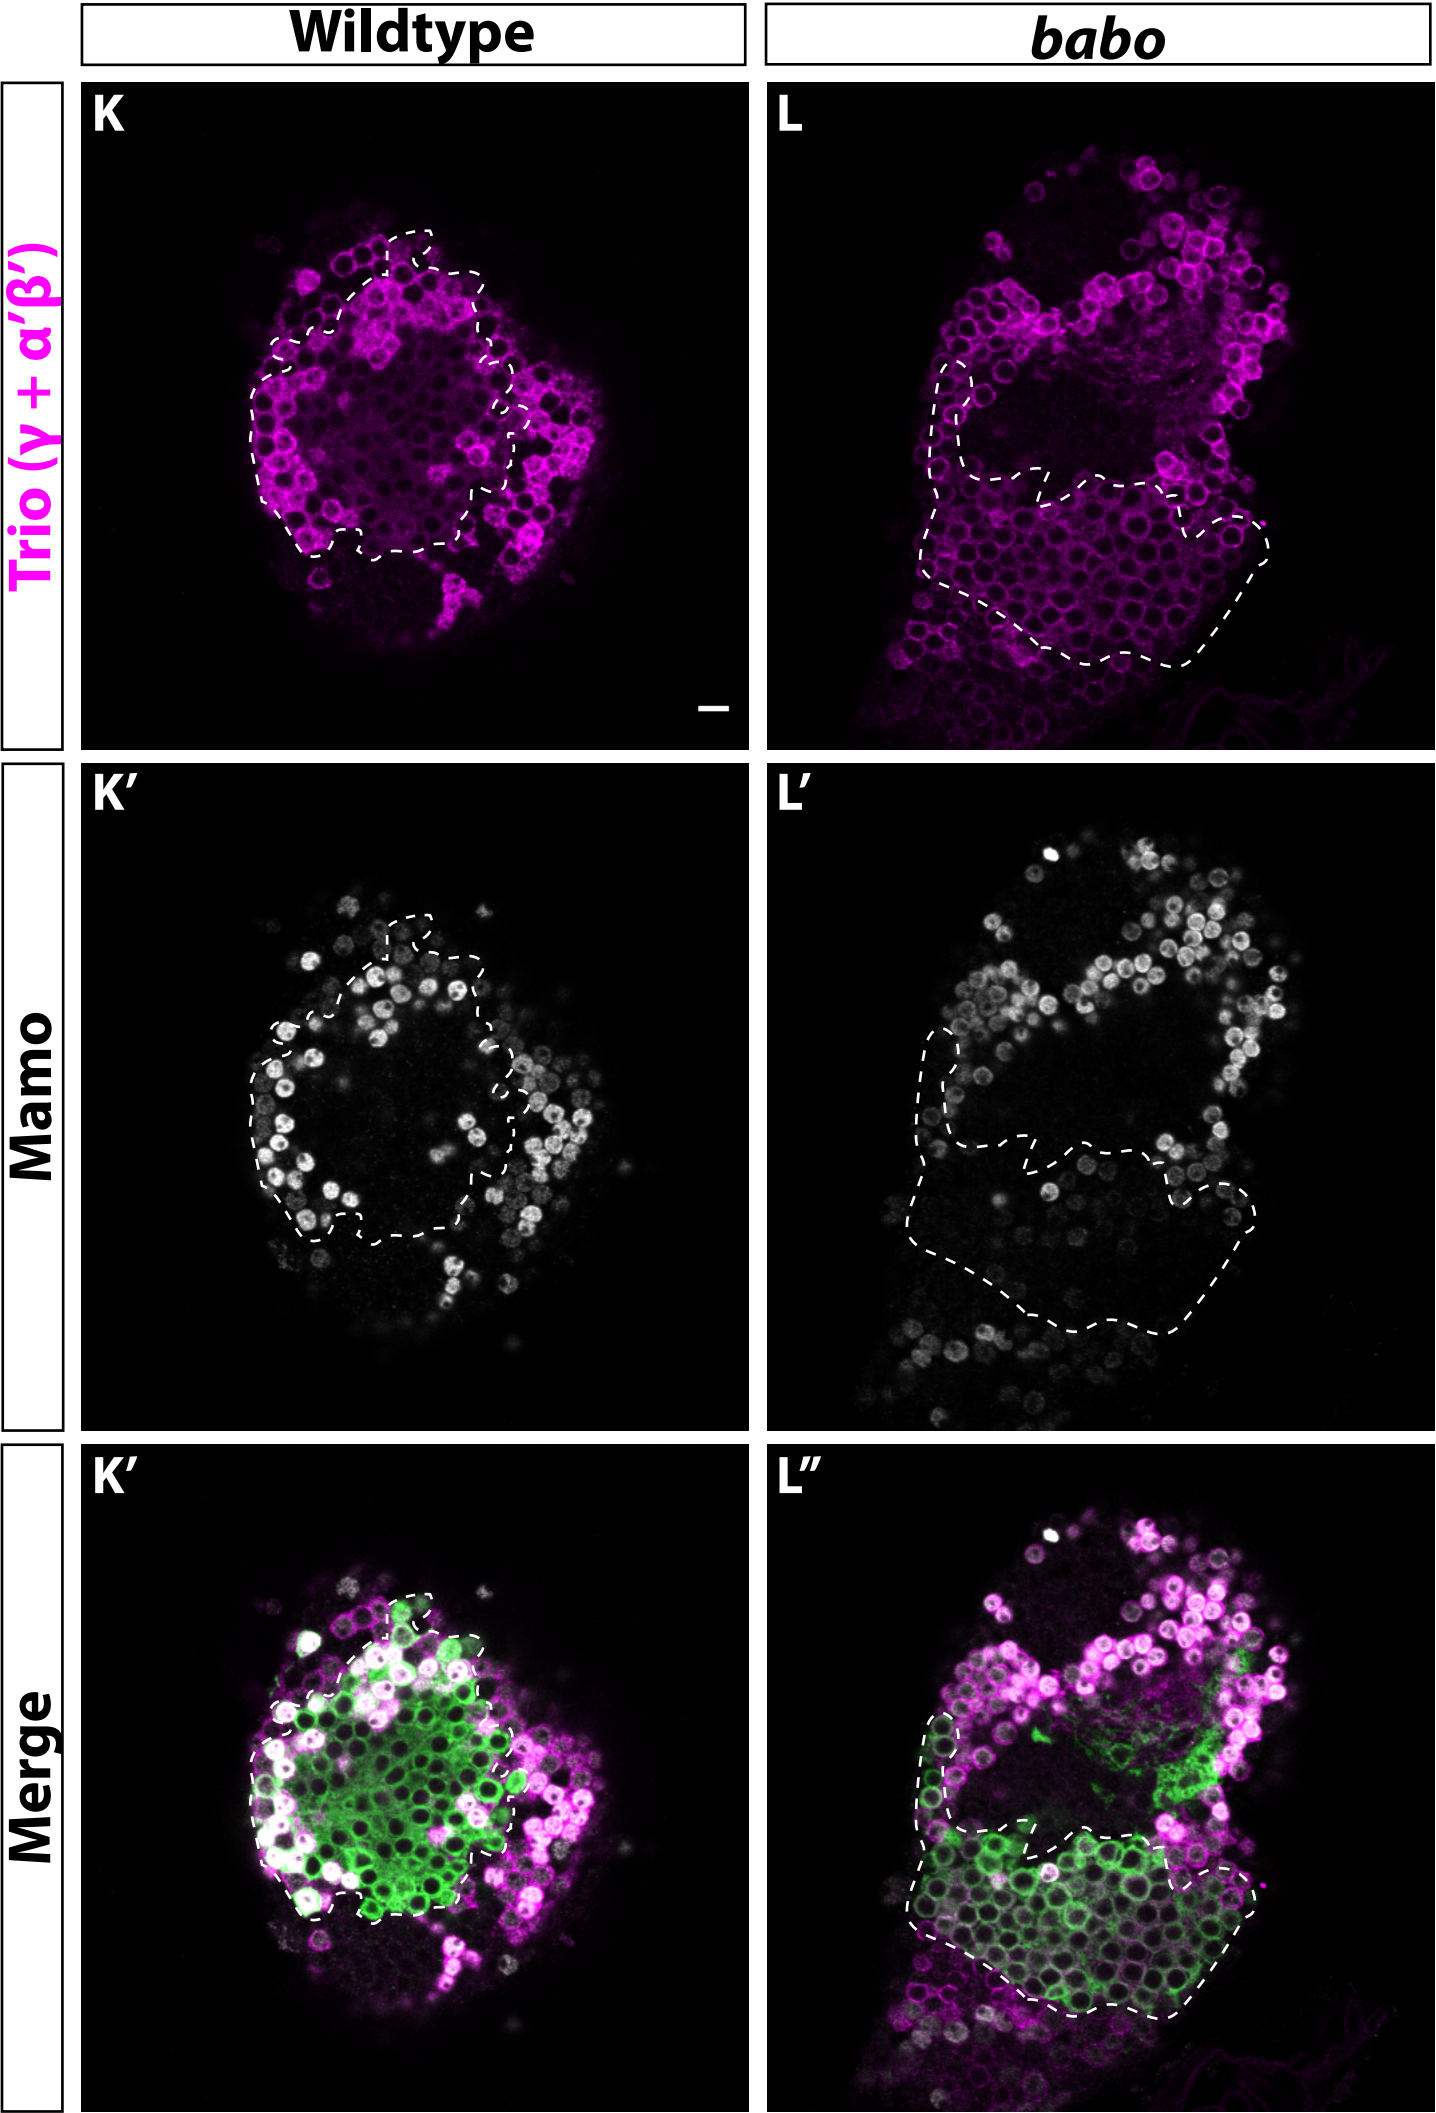

Adult: *mb-Gal4* wildtype

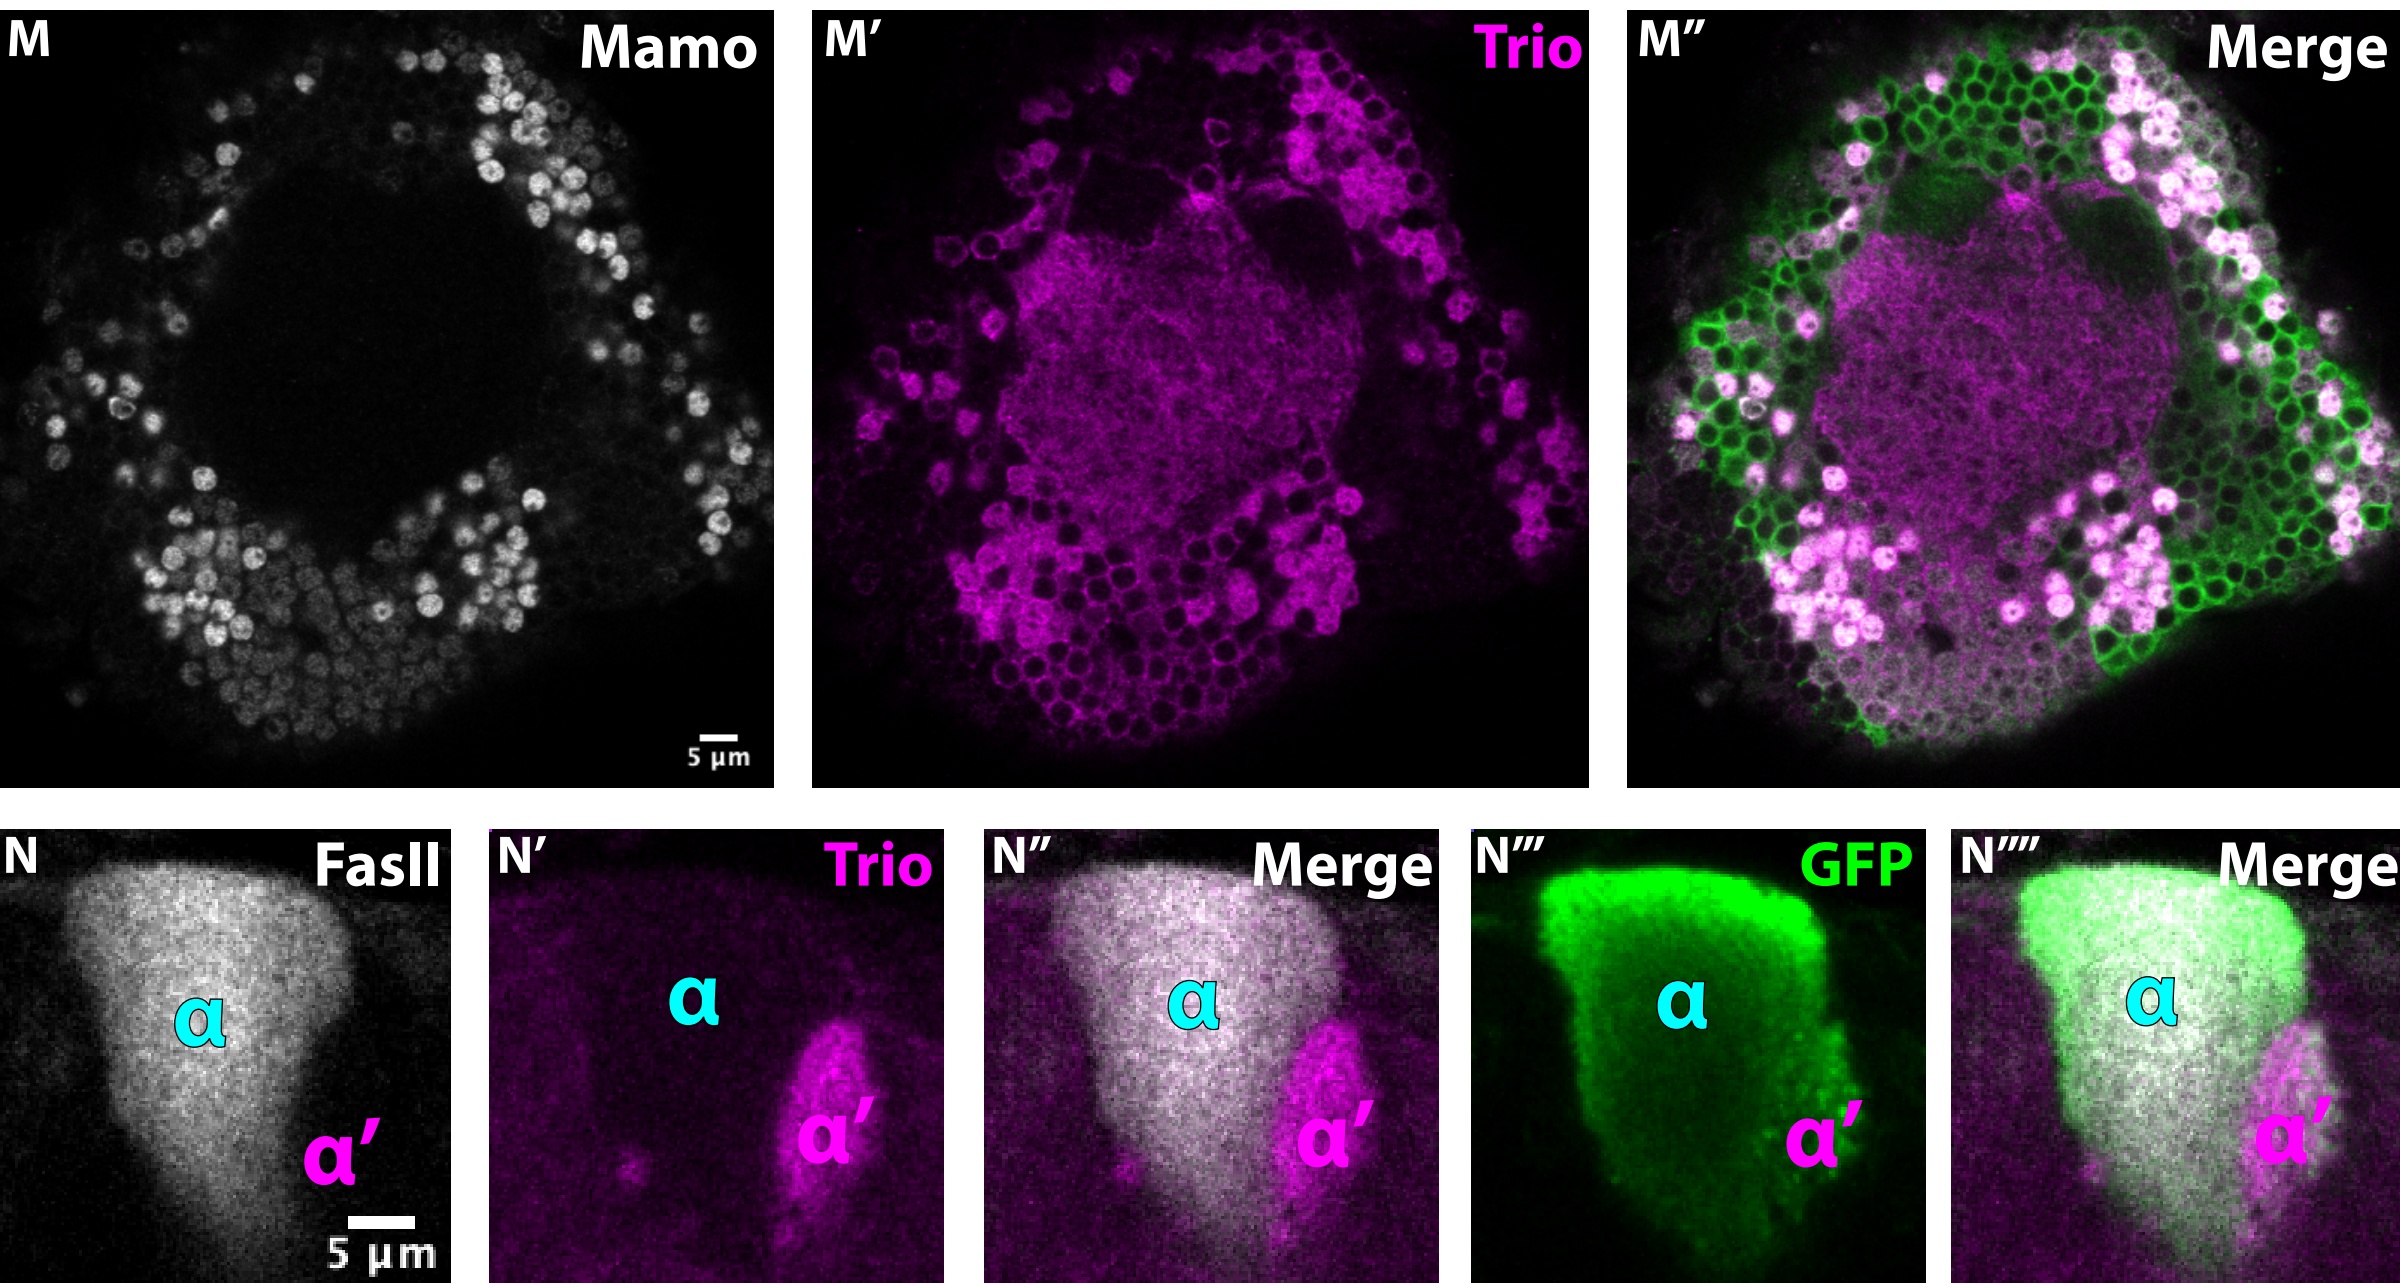

Adult: *mb-Gal4* > *UAS-babo-RNAi*

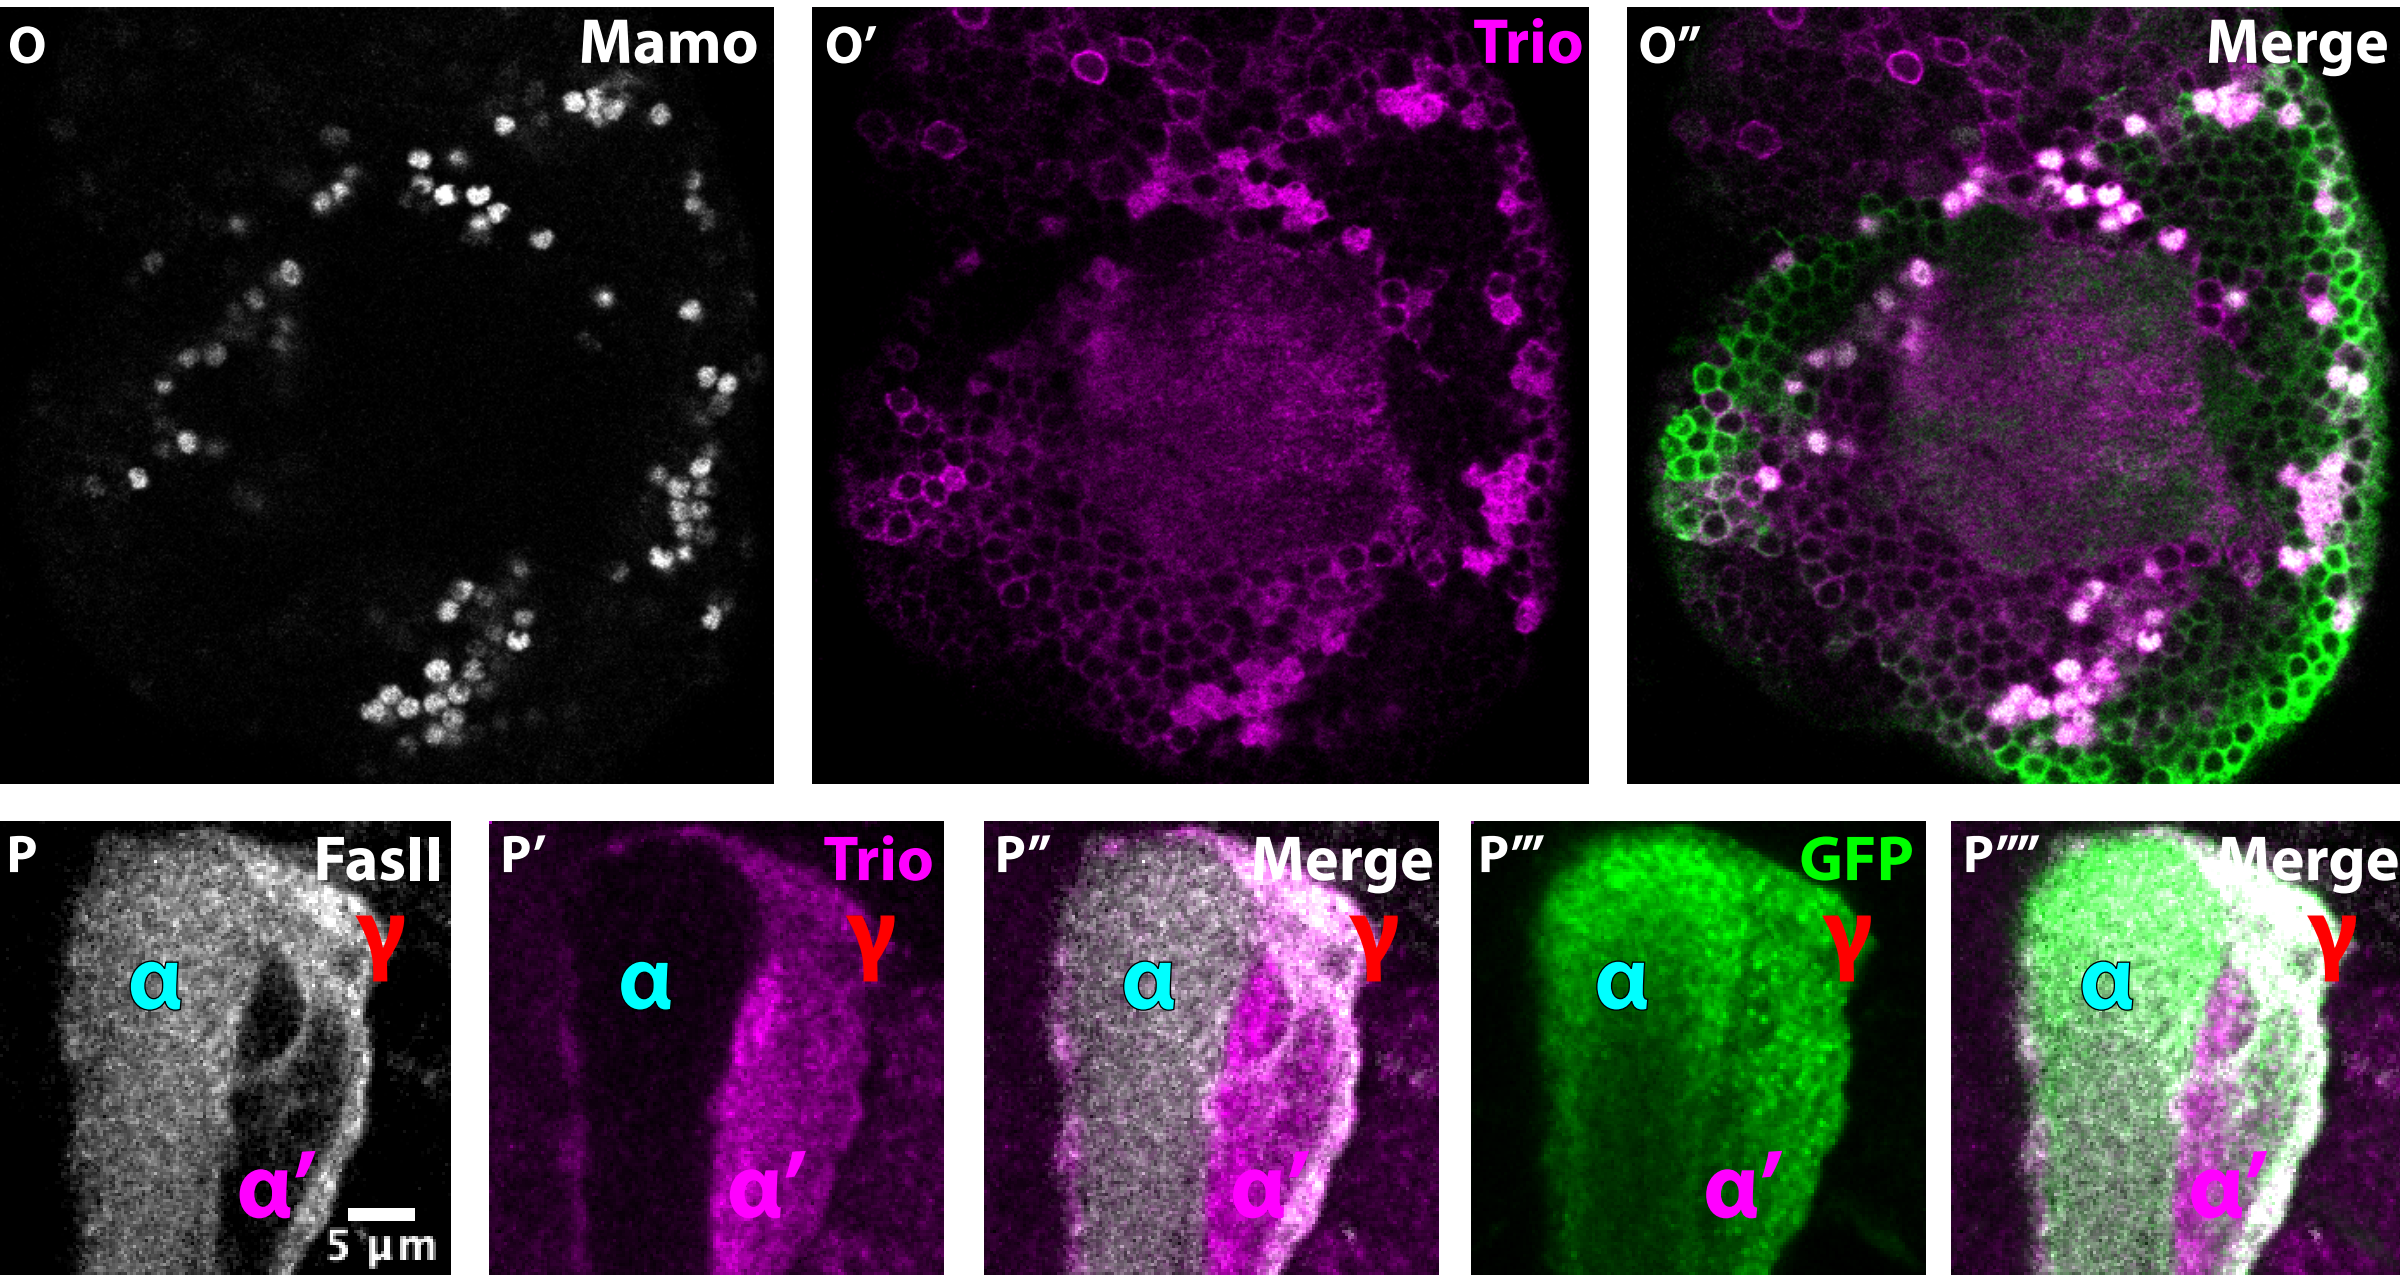

Adult: neuroblast clone induced at L1

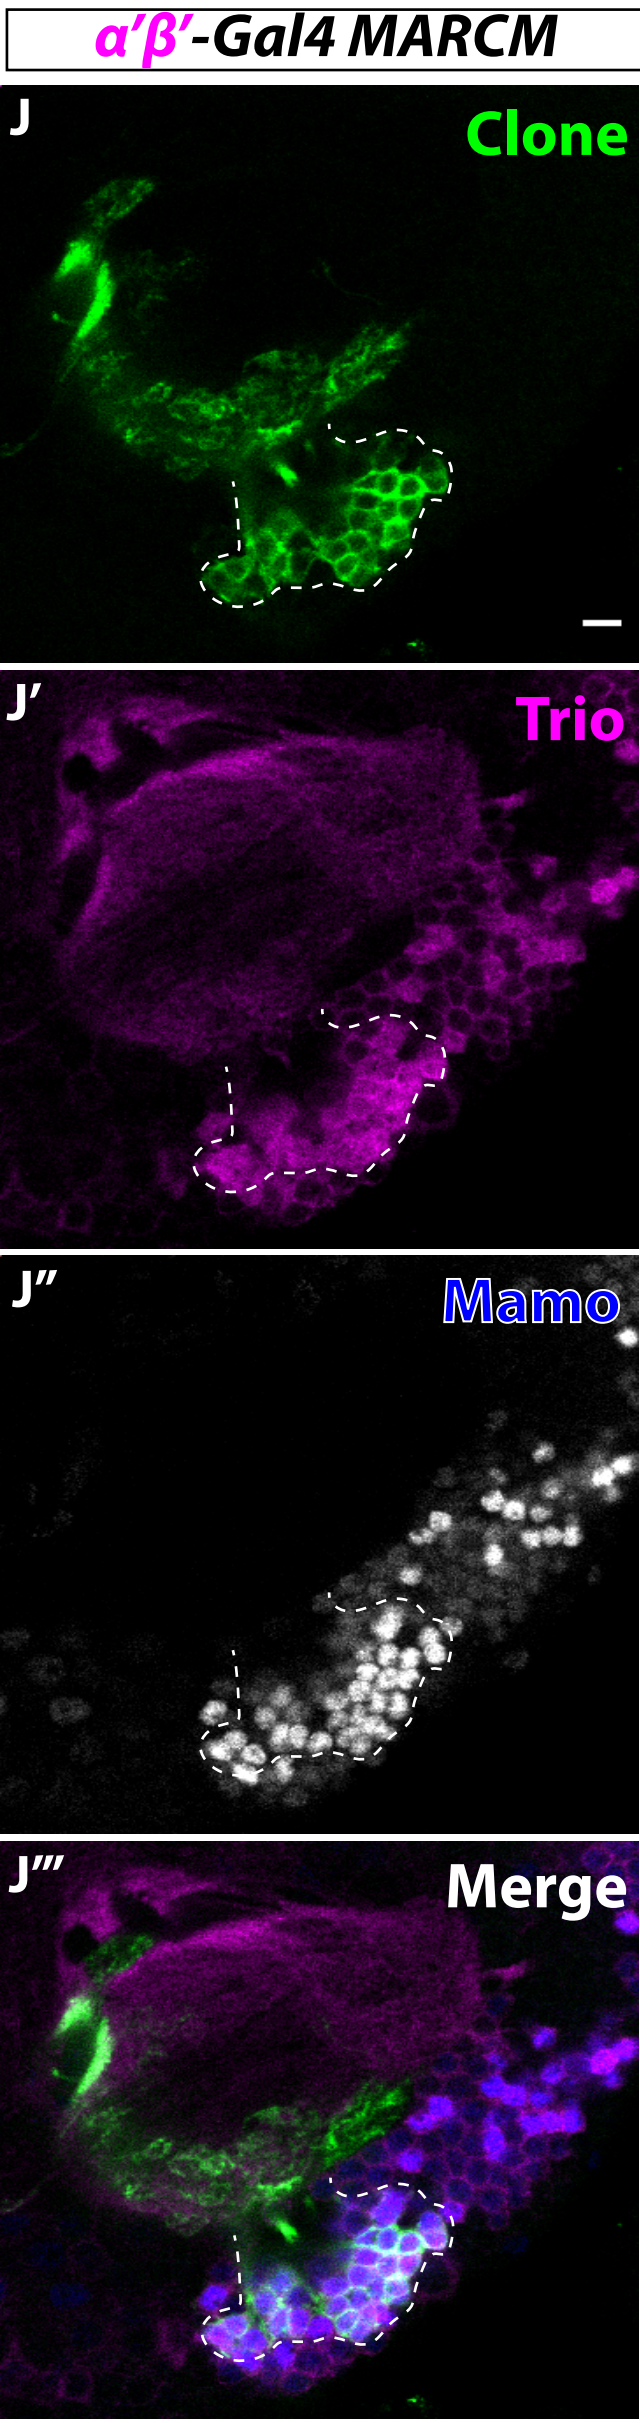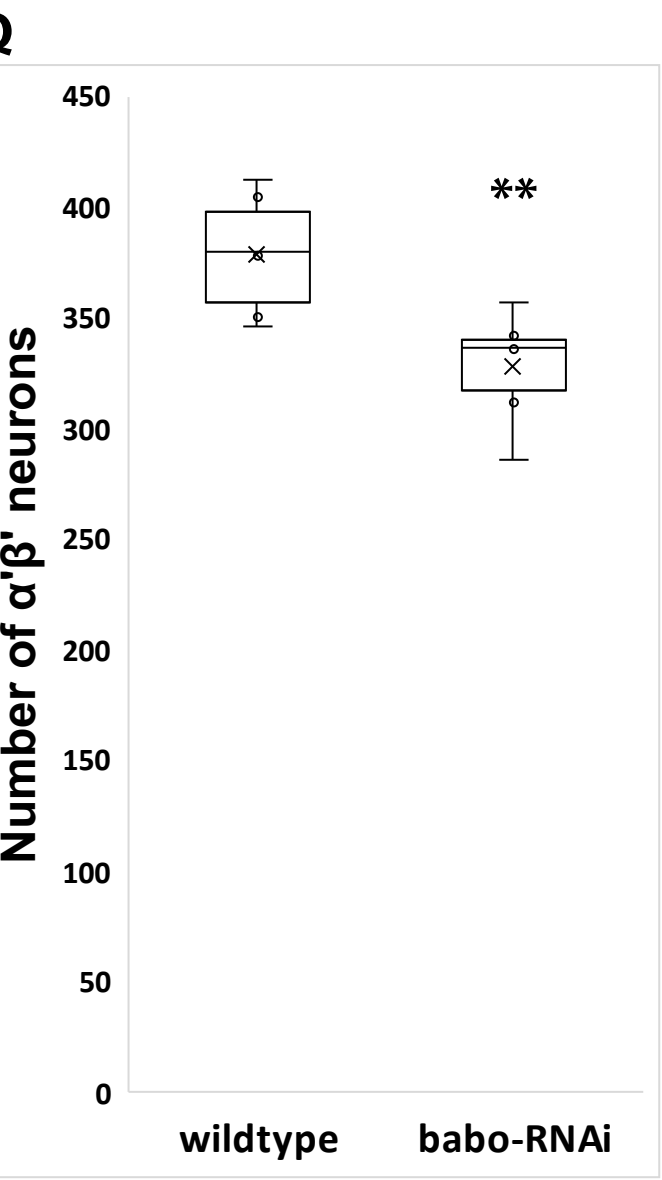

Supplement: supp [file elife-58880-supp-v1.zip]
