# Supplementary material for: Extrinsic activin signaling cooperates with an intrinsic temporal program to increase mushroom body neuronal diversity
Source: eLife journal article supplement (doi:10.7554/elife.58880), 2020-07-06

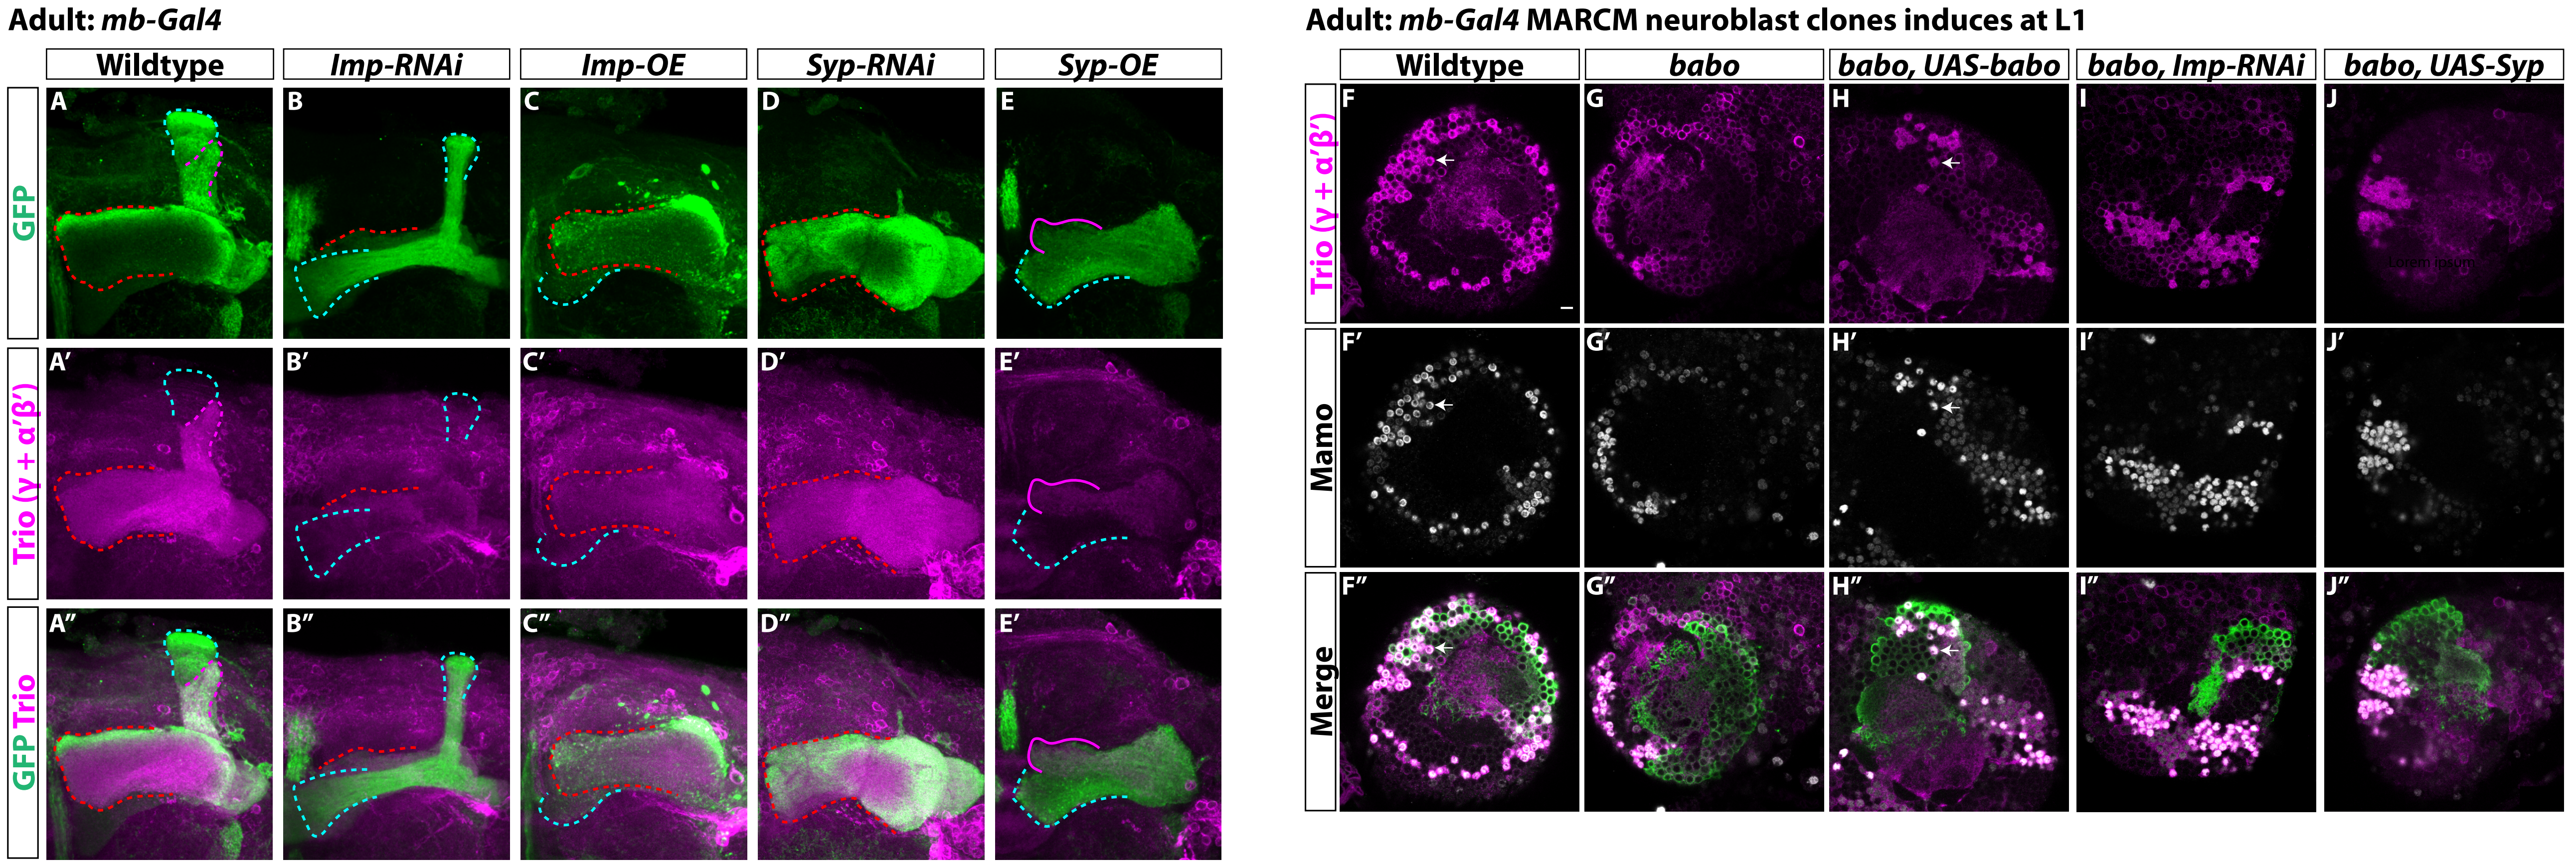

Adult: *mb-Gal4* MARCM neuroblast clones induced at L1

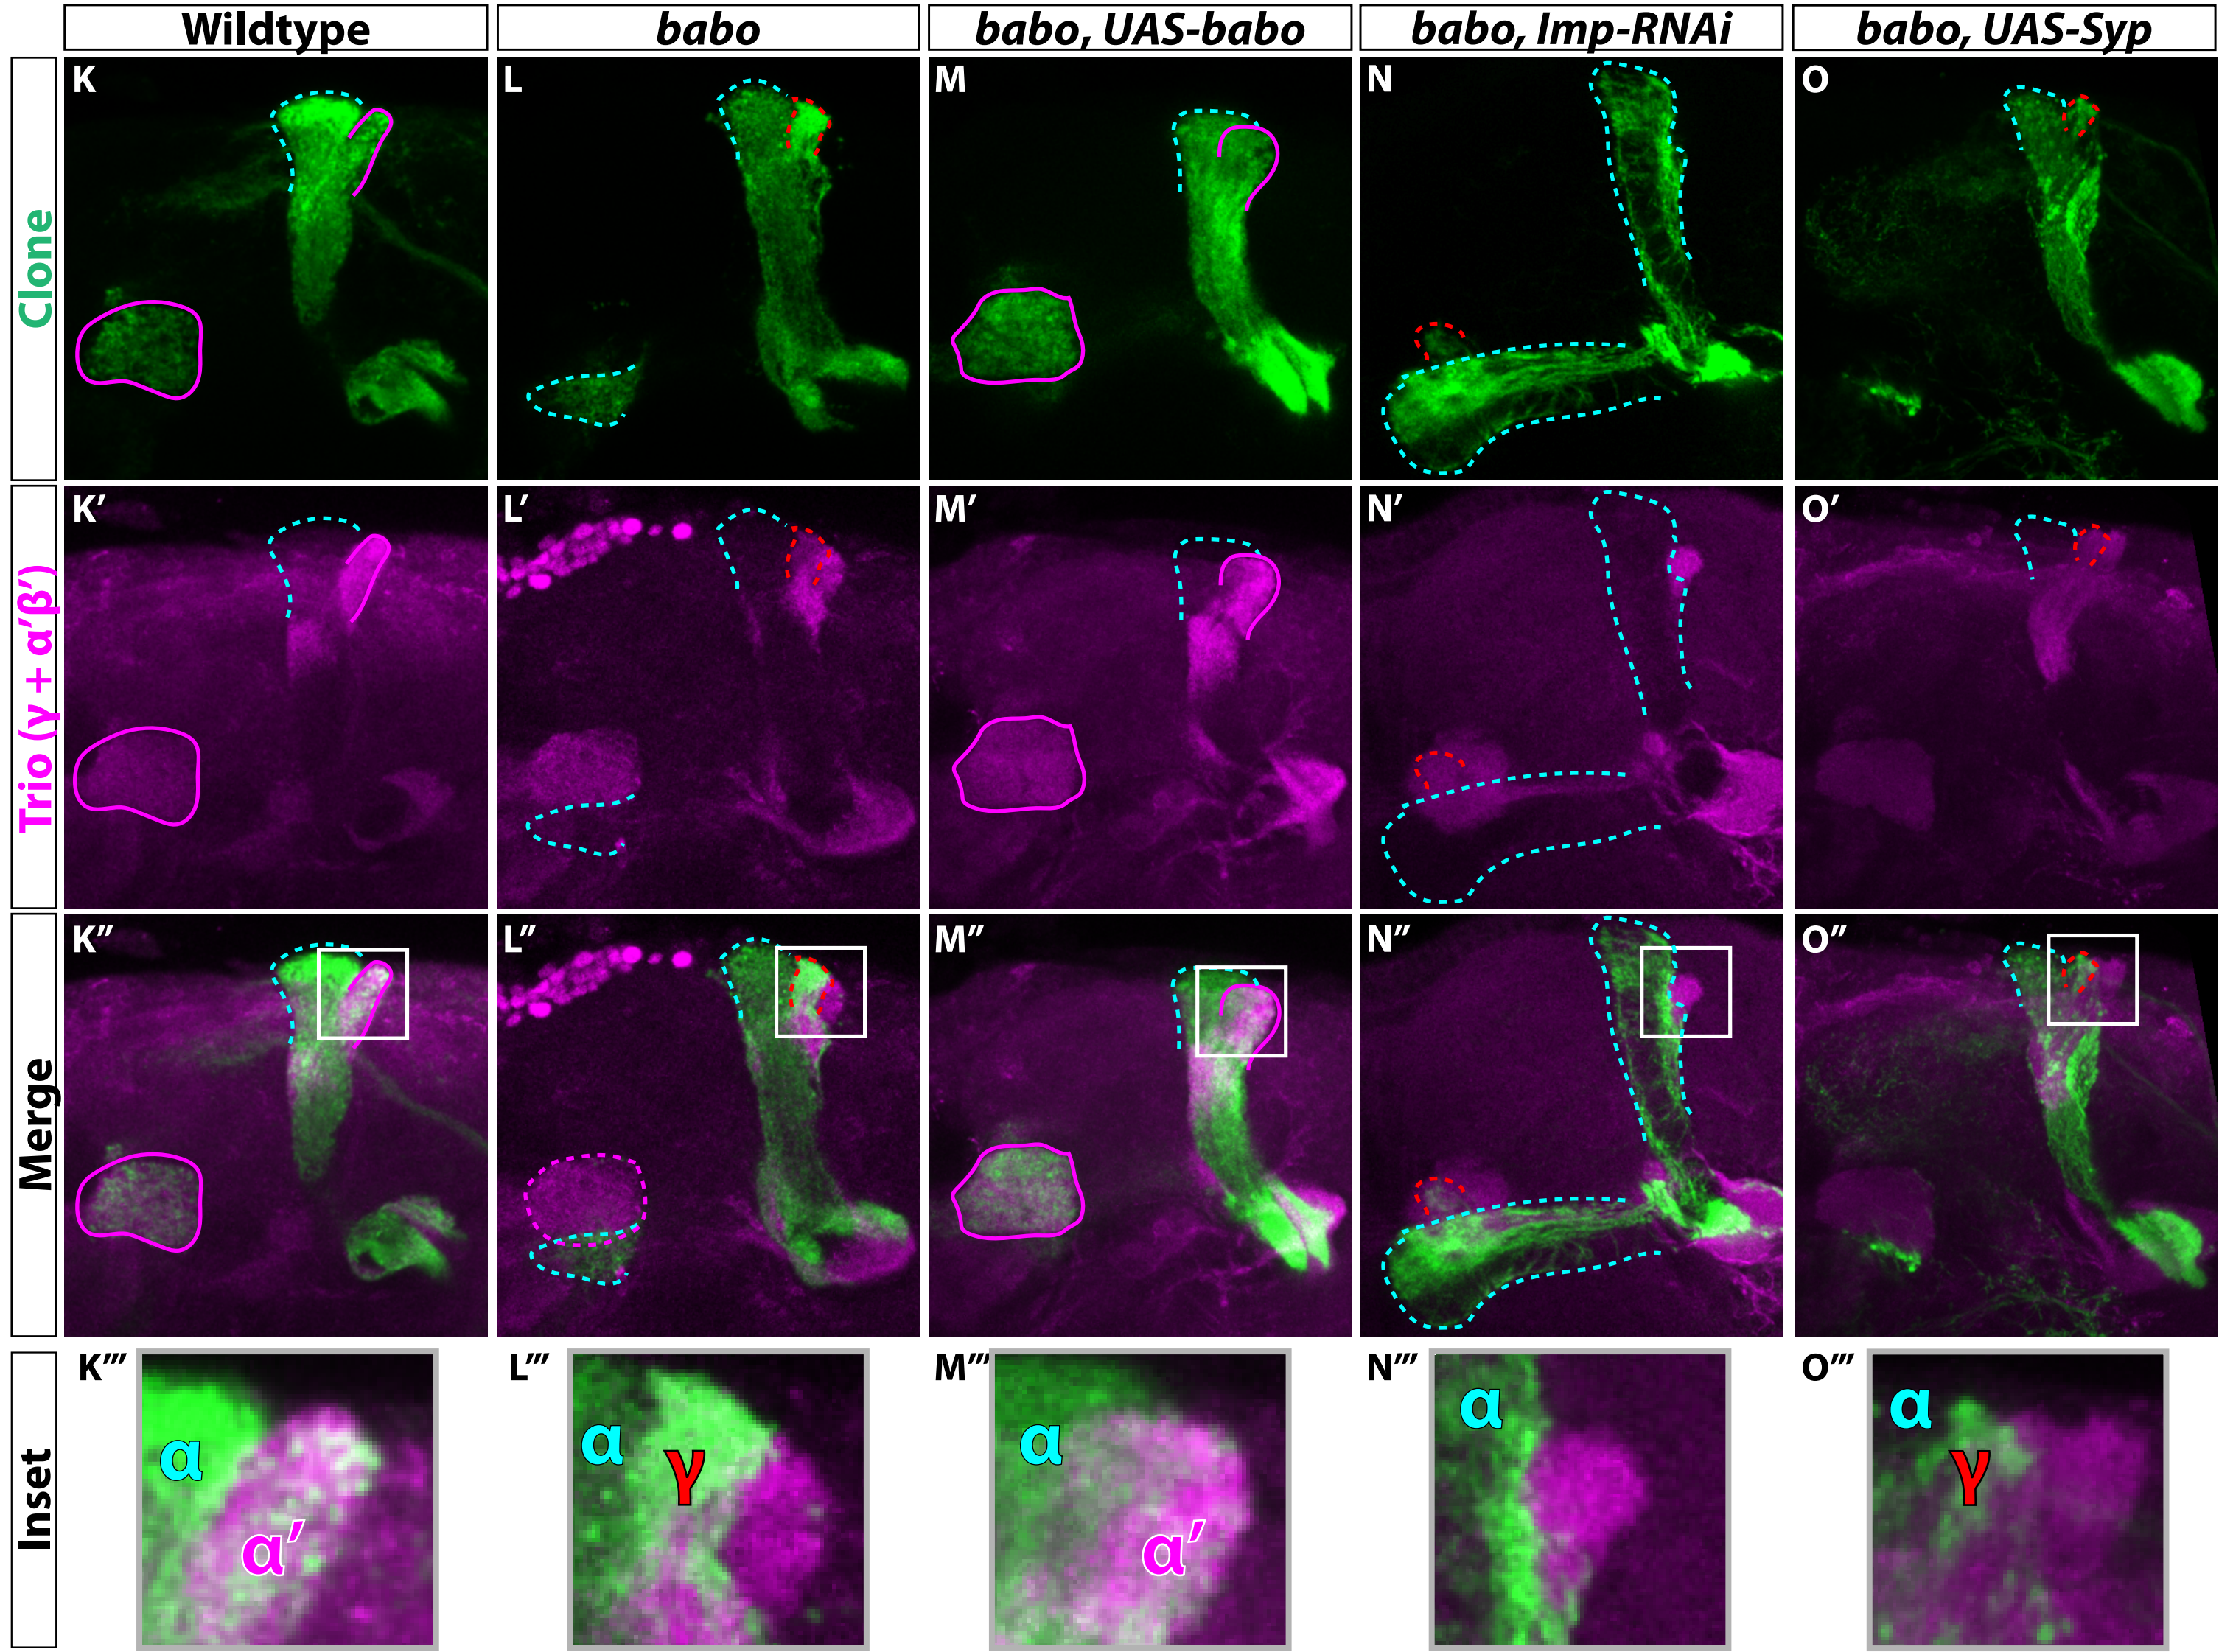

Adult axonal morphology:  $\gamma$ ,  $\alpha'\beta'$ ,  $\alpha\beta$

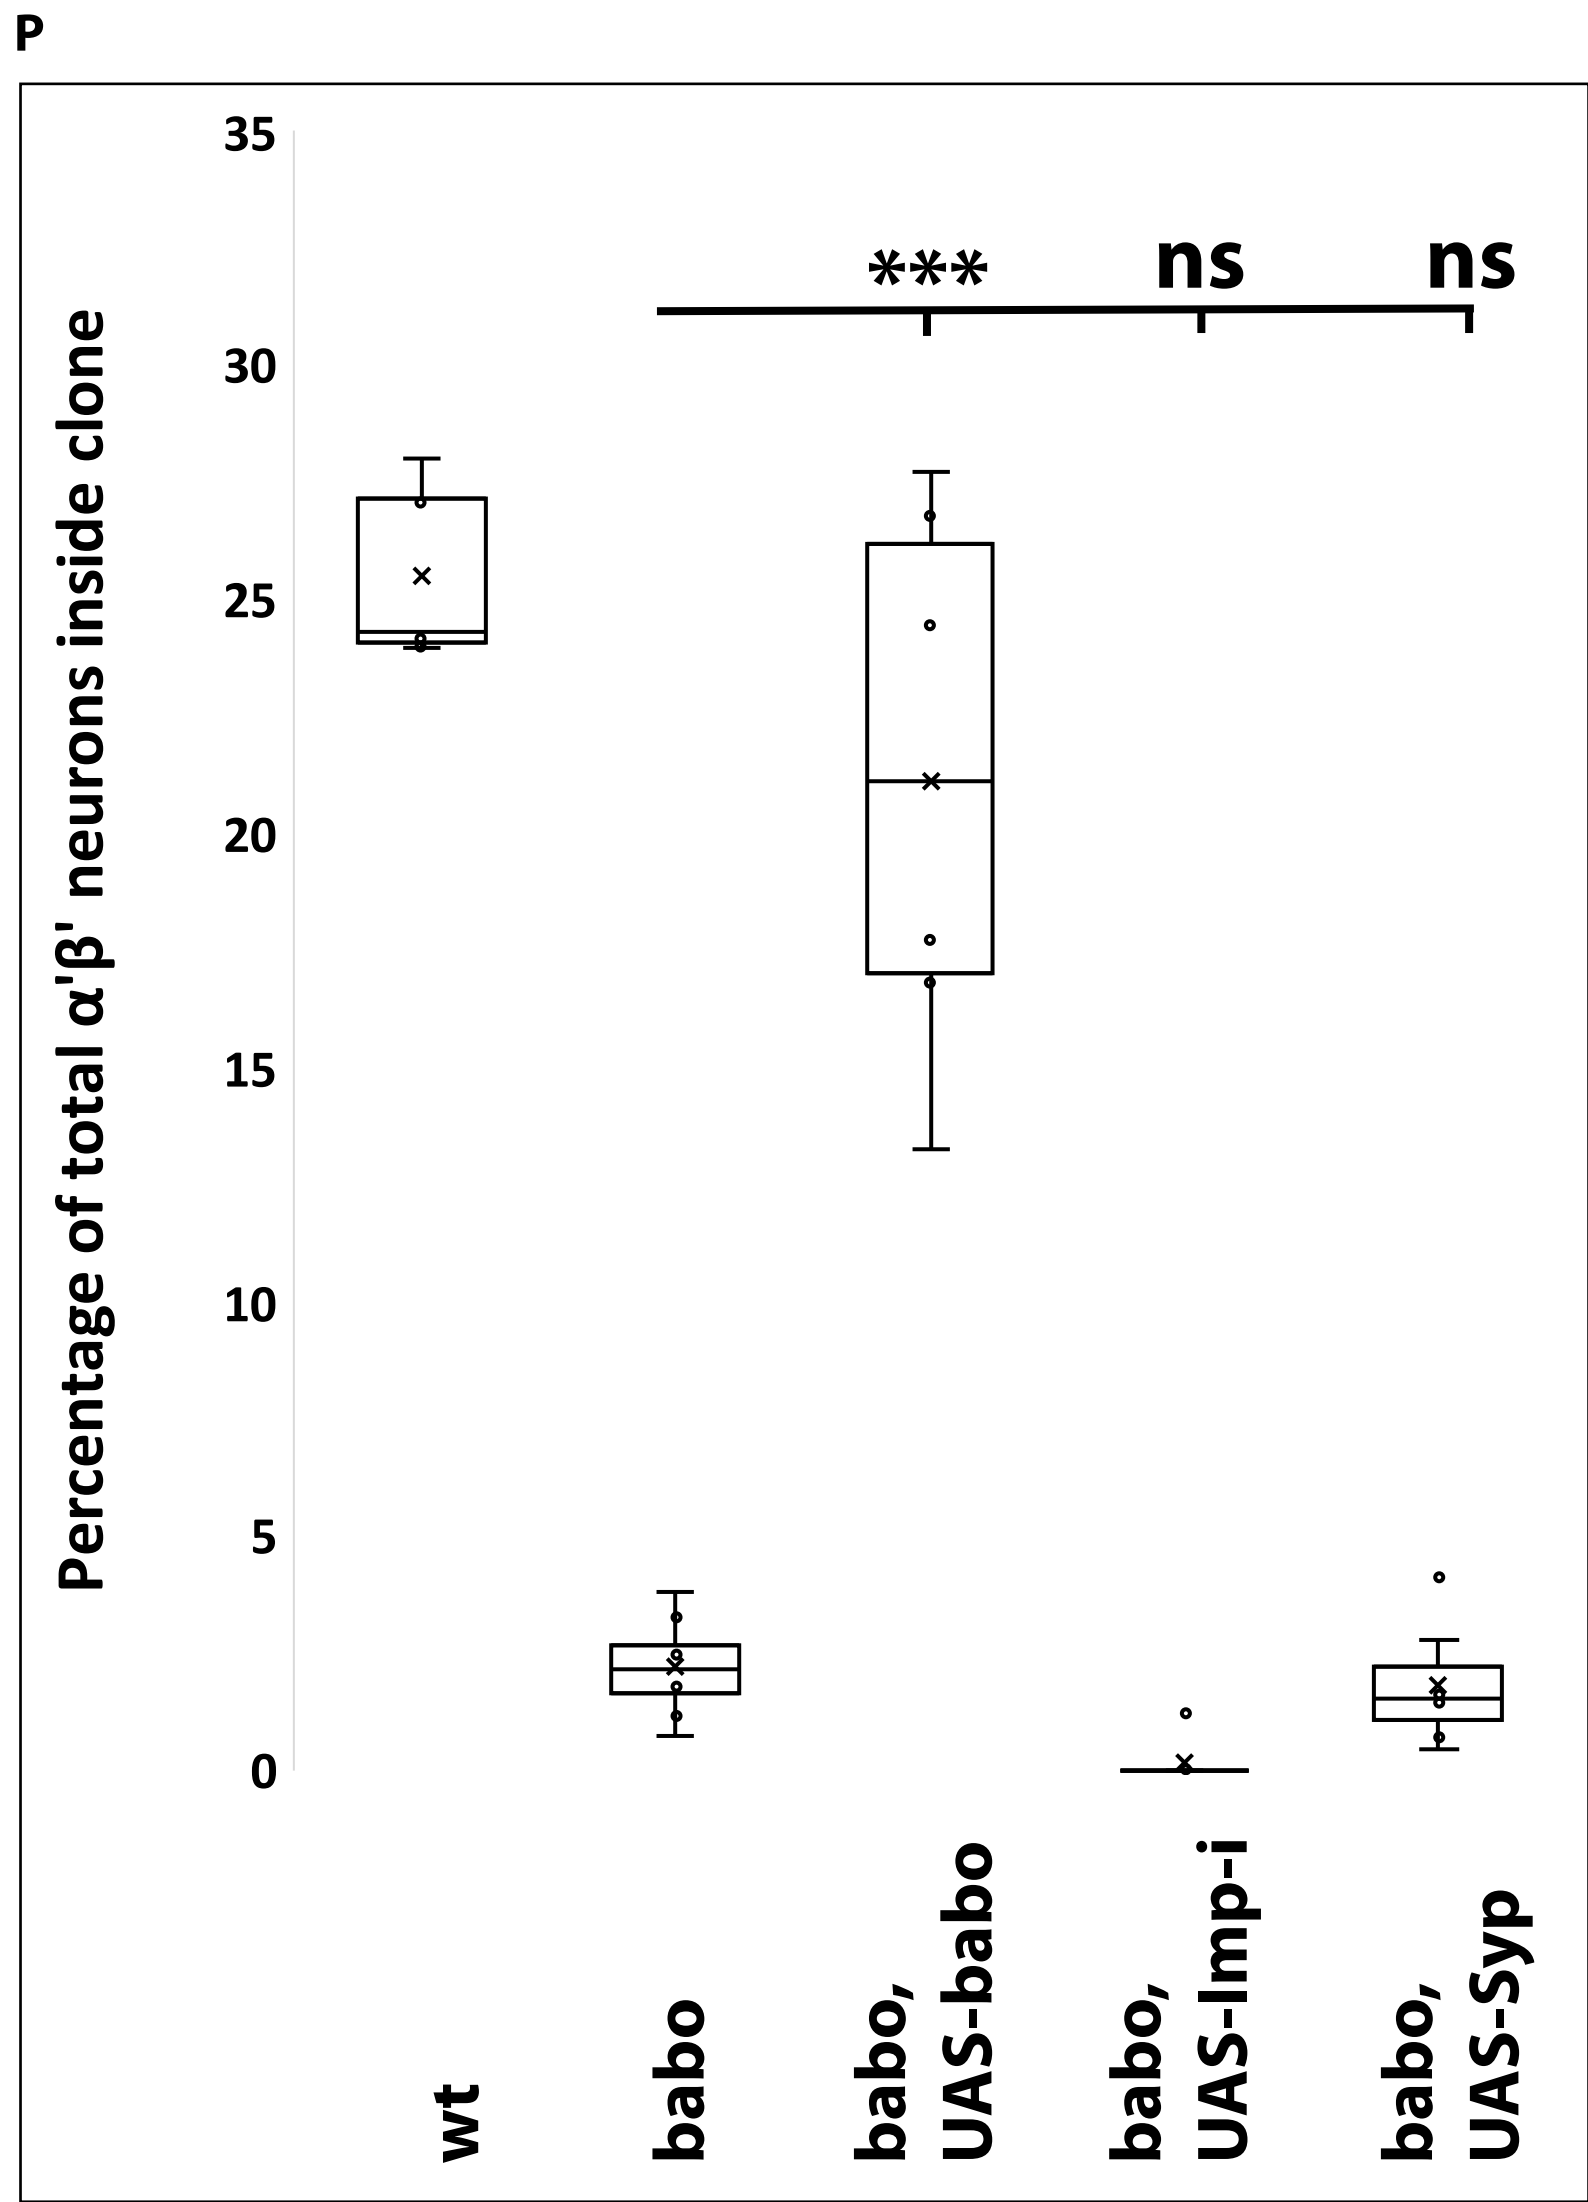

Supplement: supp [file elife-58880-supp-v1.zip]
